# Supplementary material
Source: MDPI journal article supplement (https://www.mdpi.com/2218-2004/11/9/115)

# Energetic and Spectroscopic Properties of the Low-Lying Isomers of C<sub>5</sub>H: A High-Level ab Initio Study

Sayon Satpati <sup>1,†</sup>, Tarun Roy <sup>1,†</sup>, Anakuthil Anoop <sup>2</sup>, Venkatesan S. Thimmakondur <sup>3,\*</sup> and Subhas Ghosal <sup>1,\*</sup>

<sup>1</sup> Department of Chemistry, National Institute of Technology Durgapur, M G Avenue, Durgapur 713209, West Bengal, India

<sup>2</sup> Department of Chemistry, Indian Institute of Technology Kharagpur, Kharagpur 721302, West Bengal, India

<sup>3</sup> Department of Chemistry and Biochemistry, San Diego State University, San Diego, CA 92182-1030, USA

\* Correspondence: vthimmakondusamy@sdsu.edu (V.S.T.); subhas.ghosal@ch.nitdgp.ac.in (S.G.)

† These authors contributed equally to this work.

## List of Tables:

Table S1: Optimized geometries of the C<sub>5</sub>H isomers (**1-14**) along with their cationic and anionic forms in Cartesian coordinates (in Angstrom units) obtained at UB3LYP/6-311+G (d, p) level of theory. S3-S9

Table S2: Geometries of transition states involved in the rearrangement scheme in Cartesian coordinates (in Angstrom units) obtained at UB3LYP/6-311+G (d, p) level of theory. S10

Table S3: Point Group, relative zero-point corrected energy ( $\Delta E_0$  in kJ mol<sup>-1</sup>), dipole moments (in Debye) and rotational constants (in MHz) of C<sub>5</sub>H isomers of **1-14** in their ground electronic states calculated at the UB3LYP/6-311+G(d,p) level of theory. S11

Table S4: Point Group, relative zero-point corrected energy ( $\Delta E_0$  in kJ mol<sup>-1</sup>), dipole moments (in Debye) and rotational constants (in MHz) of cationic counterpart of C<sub>5</sub>H isomers of **1-14** in their singlet ground electronic states calculated at the UB3LYP/6-311+G(d,p) level of theory. S11

Table S5: Point Group, relative zero-point corrected energy ( $\Delta E_0$  in kJ mol<sup>-1</sup>), dipole moments (in Debye) and rotational constants (in MHz) of anionic counterpart of C<sub>5</sub>H isomers of **1-14** in their singlet ground electronic states calculated at the UB3LYP/6-311+G(d,p) level of theory. S12

Table S6: Point Group, relative zero-point corrected energy ( $\Delta E_0$  in kJ mol<sup>-1</sup>), dipole moments (in Debye) and rotational constants (in MHz) of cationic counterpart of C<sub>5</sub>H isomers of **1-14** in their triplet ground electronic states calculated at the UB3LYP/6-311+G(d,p) level of theory. S12

Table S7: Point Group, relative zero-point corrected energy ( $\Delta E_0$  in kJ mol<sup>-1</sup>), dipole moments (in Debye) and rotational constants (in MHz) of anionic counterpart of C<sub>5</sub>H isomers of **1-14** in their triplet ground electronic states calculated at the UB3LYP/6-311+G(d,p) level of theory. S13

Table S8: Point Group, relative zero-point corrected energy ( $\Delta E_0$  in kJ mol<sup>-1</sup>), dipole moments (in Debye) and rotational constants (in MHz) of C<sub>5</sub>H isomers of **1-14** in their ground electronic states calculated at the UωB97XD/6-311+G(d,p) level of theory. S13

Table S9: Point Group, relative zero-point corrected energy ( $\Delta E_0$  in kJ mol<sup>-1</sup>), dipole moments (in Debye) and rotational constants (in MHz) of cationic counterpart of C<sub>5</sub>H isomers of **1-14** in their singlet ground electronic states calculated at the UωB97XD/6-311+G(d,p) level of theory. S14

Table S10: Point Group, relative zero-point corrected energy ( $\Delta E_0$  in kJ mol<sup>-1</sup>), dipole moments (in Debye) and rotational constants (in MHz) of anionic counterpart of C<sub>5</sub>H isomers of **1-14** in their singlet ground electronic states calculated at the UωB97XD/6-311+G(d,p) level of theory. S14

Table S11: Point Group, relative zero-point corrected energy ( $\Delta E_0$  in kJ mol<sup>-1</sup>), dipole moments (in Debye) and rotational constants (in MHz) of cationic counterpart of C<sub>5</sub>H isomers of **1-14** in their triplet ground electronic states calculated at the UωB97XD/6-311+G(d,p) level of theory. S15

Table S12: Point Group, relative zero-point corrected energy ( $\Delta E_0$  in kJ mol<sup>-1</sup>), dipole moments (in Debye) and rotational constants (in MHz) of anionic counterpart of C<sub>5</sub>H isomers of **1-14** in their triplet ground electronic states calculated at the UωB97XD/6-311+G(d,p) level of theory. S15  
S16

Table S13: Ionization Potential (IP, in *eV*) and Electron Enthalpy (EA, in *eV*) of Isomer **6** to **14** calculated at different levels of theory.

#### List of Figures:

Figure S1: Optimized geometries of isomers **13** to **16** of the C<sub>5</sub>H radicals. S17

Figure S2: Intrinsic Reaction Coordinate for the transition state **15<sup>z</sup>** and **16<sup>z</sup>** calculated at UB3LYP/6-311+G(d,p) level of theory. S18

Figure S3: Intrinsic Reaction Coordinate for the rearrangement from **3** to **1** and **10** to **1** calculated at UB3LYP/6-311+G(d,p) level of theory. S19

Figure S4: Intrinsic Reaction Coordinate for the rearrangement from **10** to **5** and **5** to **3** calculated at UB3LYP/6-311+G(d,p) level of theory. S20

Figure S5: Intrinsic Reaction Coordinate for the rearrangement from **10** to **5** and **4** to **2** calculated at UB3LYP/6-311+G(d,p) level of theory. S21

Figure S6: Intrinsic Reaction Coordinate for the rearrangement from **6** to **2** and **10** to **5** calculated at UB3LYP/6-311+G(d,p) level of theory. S22

Figure S7: Intrinsic Reaction Coordinate for the rearrangement from **12** to **4** and **10** to **5** calculated at UB3LYP/6-311+G(d,p) level of theory. S23

Figure S8: Energy evolution of isomer **6** - **14** of C<sub>5</sub>H obtained from the AIMD simulation carried out at 298.15K temperatures and 1 atm pressure for 2500 fs at the B3LYP/6-311+G(d,p) level of theory. S24

Table S1: Optimized geometries of the C<sub>5</sub>H isomers (**1-14**) along with their cationic and anionic forms in Cartesian coordinates (in Angstrom units) obtained at UB3LYP/6-311+G(d,p) level of theory.

| 1-c (singlet) |              |              |              | 1-c (triplet) |              |              |              |
|---------------|--------------|--------------|--------------|---------------|--------------|--------------|--------------|
| C             | -2.688829000 | 0.010849000  | 0.001746000  | C             | 0.000000000  | 0.000000000  | 2.647769000  |
| C             | -1.373226000 | -0.000148000 | -0.002446000 | C             | 0.000000000  | 0.000000000  | 1.404789000  |
| C             | -0.120816000 | -0.010380000 | -0.000625000 | C             | 0.000000000  | 0.000000000  | 0.117065000  |
| C             | 1.196100000  | -0.024564000 | 0.001822000  | C             | 0.000000000  | 0.000000000  | -1.179160000 |
| C             | 2.411514000  | 0.011588000  | -0.000255000 | C             | 0.000000000  | 0.000000000  | -2.410128000 |
| H             | 3.482441000  | 0.011634000  | -0.000269000 | H             | 0.000000000  | 0.000000000  | -3.482006000 |
| 1             |              |              |              |               |              |              |              |
|               | C            | -2.696840000 | -0.000834000 |               | -0.000124000 |              |              |
|               | C            | -1.388649000 | -0.000053000 |               | 0.000188000  |              |              |
|               | C            | -0.121531000 | 0.001181000  |               | 0.000007000  |              |              |
|               | C            | 1.200868000  | 0.001020000  |               | -0.000085000 |              |              |
|               | C            | 2.424716000  | -0.001110000 |               | 0.000020000  |              |              |
|               | H            | 3.488621000  | -0.001225000 |               | -0.000033000 |              |              |
| 1-a (singlet) |              |              |              | 1-a (triplet) |              |              |              |
| C             | 0.000000000  | 0.000000000  | 2.694617000  | C             | 0.000000000  | 0.000000000  | 2.696889000  |
| C             | 0.000000000  | 0.000000000  | 1.411453000  | C             | 0.000000000  | 0.000000000  | 1.411969000  |
| C             | 0.000000000  | 0.000000000  | 0.110910000  | C             | 0.000000000  | 0.000000000  | 0.111515000  |
| C             | 0.000000000  | 0.000000000  | -1.193925000 | C             | 0.000000000  | 0.000000000  | -1.195931000 |
| C             | 0.000000000  | 0.000000000  | -2.439934000 | C             | 0.000000000  | 0.000000000  | -2.441095000 |
| H             | 0.000000000  | 0.000000000  | -3.498727000 | H             | 0.000000000  | 0.000000000  | -3.500085000 |
| 2-c (singlet) |              |              |              | 2-c (triplet) |              |              |              |
| C             | 0.00000000   | 0.641826000  | -1.637721000 | C             | 0.000000000  | 0.674822000  | -1.632863000 |
| C             | 0.00000000   | 0.000000000  | -0.387281000 | C             | 0.000000000  | 0.000000000  | -0.394109000 |
| C             | 0.00000000   | 0.000000000  | 0.954753000  | C             | 0.000000000  | 0.000000000  | 0.955205000  |
| C             | 0.00000000   | -0.641826000 | -1.637721000 | C             | 0.000000000  | -0.674822000 | -1.632863000 |
| C             | 0.00000000   | 0.000000000  | 2.167794000  | C             | 0.000000000  | 0.000000000  | 2.165251000  |
| H             | 0.00000000   | 0.000000000  | 3.241058000  | H             | 0.000000000  | 0.000000000  | 3.236270000  |
| 2             |              |              |              |               |              |              |              |
|               | C            | 1.629838000  | -0.679092000 |               | -0.000234000 |              |              |
|               | C            | 0.413706000  | -0.000129000 |               | 0.000367000  |              |              |
|               | C            | -0.963257000 | 0.000147000  |               | 0.000542000  |              |              |
|               | C            | 1.630498000  | 0.679015000  |               | -0.000234000 |              |              |
|               | C            | -2.171507000 | 0.000062000  |               | -0.000275000 |              |              |
|               | H            | -3.235669000 | -0.000015000 |               | -0.000995000 |              |              |
| 2-a (singlet) |              |              |              | 2-a (triplet) |              |              |              |
| C             | 0.000000000  | 0.722622000  | -1.616388000 | C             | 0.000000000  | 0.653587000  | -1.686831000 |
| C             | 0.000000000  | 0.000000000  | -0.427920000 | C             | 0.000000000  | 0.000000000  | -0.352386000 |
| C             | 0.000000000  | 0.000000000  | 0.953705000  | C             | 0.000000000  | 0.000000000  | 0.965804000  |
| C             | 0.000000000  | -0.722622000 | -1.616388000 | C             | 0.000000000  | -0.653587000 | -1.686831000 |
| C             | 0.000000000  | 0.000000000  | 2.168897000  | C             | 0.000000000  | 0.000000000  | 2.214623000  |
| H             | 0.000000000  | 0.000000000  | 3.228564000  | H             | 0.000000000  | 0.000000000  | 3.273722000  |

**3-c (singlet)****Not Available****3-c (triplet)**

|   |              |              |             |
|---|--------------|--------------|-------------|
| C | -1.029961000 | -2.092771000 | 0.000000000 |
| C | -0.566428000 | -0.971764000 | 0.000000000 |
| C | 0.000000000  | 0.260449000  | 0.000000000 |
| C | 1.197209000  | 1.010783000  | 0.000000000 |
| C | 0.019958000  | 1.638955000  | 0.000000000 |
| H | 2.275337000  | 0.926090000  | 0.000000000 |

**3**

|   |              |              |             |
|---|--------------|--------------|-------------|
| C | -1.035940000 | 2.142112000  | 0.000000000 |
| C | -0.535958000 | 0.964598000  | 0.000000000 |
| C | 0.000000000  | -0.242138000 | 0.000000000 |
| C | 1.177752000  | -1.022466000 | 0.000000000 |
| C | 0.018977000  | -1.689461000 | 0.000000000 |
| H | 2.251017000  | -0.915867000 | 0.000000000 |

**3-a (singlet)**

|   |              |              |             |
|---|--------------|--------------|-------------|
| C | -0.416907000 | -2.336996000 | 0.000000000 |
| C | -0.227026000 | -1.102709000 | 0.000000000 |
| C | 0.000000000  | 0.246236000  | 0.000000000 |
| C | 0.840926000  | 1.305145000  | 0.000000000 |
| C | -0.506303000 | 1.608299000  | 0.000000000 |
| H | 1.855861000  | 1.680147000  | 0.000000000 |

**3-a (triplet)**

|   |              |              |             |
|---|--------------|--------------|-------------|
| C | -1.818343000 | -1.568239000 | 0.000000000 |
| C | -0.938599000 | -0.635478000 | 0.000000000 |
| C | 0.000000000  | 0.286792000  | 0.000000000 |
| C | 1.582857000  | 0.454623000  | 0.000000000 |
| C | 0.761388000  | 1.484680000  | 0.000000000 |
| H | 2.476185000  | -0.134272000 | 0.000000000 |

**4-c (singlet)****Not Available****4-c (triplet)**

|   |              |              |             |
|---|--------------|--------------|-------------|
| C | 0.771840000  | -0.636797000 | 0.000000000 |
| C | 0.000000000  | 0.625320000  | 0.000000000 |
| C | 0.002520000  | -1.728550000 | 0.000000000 |
| C | -0.770562000 | -0.639535000 | 0.000000000 |
| C | -0.002183000 | 1.886456000  | 0.000000000 |
| H | -0.009697000 | 2.958632000  | 0.000000000 |

**4**

|   |              |              |             |
|---|--------------|--------------|-------------|
| C | 0.620615000  | 0.745758000  | 0.000000000 |
| C | -0.632609000 | 0.039074000  | 0.000000000 |
| C | 1.809754000  | -0.025275000 | 0.000000000 |
| C | 0.593327000  | -0.765420000 | 0.000000000 |
| C | -1.919489000 | 0.086104000  | 0.000000000 |
| H | -2.829595000 | -0.481450000 | 0.000000000 |

**4-a (singlet)**

|   |              |              |             |
|---|--------------|--------------|-------------|
| C | 0.000000000  | 0.428054000  | 0.000000000 |
| C | 0.000890000  | -0.953751000 | 0.000000000 |
| C | -0.723439000 | 1.615785000  | 0.000000000 |
| C | 0.721695000  | 1.617005000  | 0.000000000 |
| C | 0.000571000  | -2.168984000 | 0.000000000 |
| C | 0.001702000  | -3.228658000 | 0.000000000 |

**4-a (triplet)****Not Available**

| 5-c (singlet) |             |              |              | 5-c (triplet) |             |              |              |
|---------------|-------------|--------------|--------------|---------------|-------------|--------------|--------------|
| C             | 0.000000000 | 1.932490000  | -0.686511000 | C             | 0.000000000 | 2.315840000  | -0.490773000 |
| C             | 0.000000000 | 0.762446000  | -0.039318000 | C             | 0.000000000 | 1.208536000  | 0.012727000  |
| C             | 0.000000000 | 0.000000000  | 1.089328000  | C             | 0.000000000 | 0.000000000  | 0.663603000  |
| C             | 0.000000000 | -0.762446000 | -0.039318000 | C             | 0.000000000 | -1.208536000 | 0.012727000  |
| C             | 0.000000000 | -1.932490000 | -0.686511000 | C             | 0.000000000 | -2.315840000 | -0.490773000 |
| H             | 0.000000000 | 0.000000000  | 2.173968000  | H             | 0.000000000 | 0.000000000  | 1.754931000  |

| 5 |              |              |             |
|---|--------------|--------------|-------------|
| C | -2.251713000 | 0.592278000  | 0.000000000 |
| C | -1.134827000 | -0.037658000 | 0.000000000 |
| C | 0.000000000  | -0.795229000 | 0.000000000 |
| C | 1.134838000  | -0.037687000 | 0.000000000 |
| C | 2.251710000  | 0.592275000  | 0.000000000 |
| H | -0.000048000 | -1.883875000 | 0.000000000 |

| 5-a (singlet) |             |              |              | 5-a (triplet) |             |              |              |
|---------------|-------------|--------------|--------------|---------------|-------------|--------------|--------------|
| C             | 0.000000000 | 2.414696000  | -0.436969000 | C             | 0.000000000 | 2.249261000  | -0.604368000 |
| C             | 0.000000000 | 1.237353000  | 0.000941000  | C             | 0.000000000 | 1.152962000  | 0.041348000  |
| C             | 0.000000000 | 0.000000000  | 0.591100000  | C             | 0.000000000 | 0.000000000  | 0.810418000  |
| C             | 0.000000000 | -1.237353000 | 0.000941000  | C             | 0.000000000 | -1.152962000 | 0.041348000  |
| C             | 0.000000000 | -2.414696000 | -0.436969000 | C             | 0.000000000 | -2.249261000 | -0.604368000 |
| H             | 0.000000000 | 0.000000000  | 1.685738000  | H             | 0.000000000 | 0.000000000  | 1.893726000  |

| 6-c (singlet) |   | 6-c (triplet) |              |              |
|---------------|---|---------------|--------------|--------------|
| Not Available | C | 1.638122000   | 0.505767000  | 0.000000000  |
|               | C | 0.288590000   | 0.131142000  | 0.000000000  |
|               | C | -1.948881000  | -0.540185000 | -0.000001000 |
|               | C | -1.074106000  | 0.457690000  | 0.000001000  |
|               | C | 1.334700000   | -0.803044000 | -0.000001000 |
|               | H | -1.430554000  | 1.491782000  | 0.000001000  |

| 6 |              |              |              |
|---|--------------|--------------|--------------|
| C | 1.646443000  | -0.537030000 | -0.000002000 |
| C | 0.327313000  | -0.081729000 | 0.000003000  |
| C | -2.046476000 | 0.468825000  | -0.000001000 |
| C | -1.070841000 | -0.405687000 | 0.000000000  |
| C | 1.376220000  | 0.797776000  | 0.000000000  |
| H | -1.395951000 | -1.452927000 | -0.000002000 |

| 6-a (singlet) |              |              |              | 6-a (triplet) |              |              |             |
|---------------|--------------|--------------|--------------|---------------|--------------|--------------|-------------|
| C             | 1.482270000  | -0.462432000 | -0.001697000 | C             | -0.164775000 | 1.742224000  | 0.000000000 |
| C             | 0.005388000  | 0.126453000  | -0.000179000 | C             | 0.000000000  | 0.310603000  | 0.000000000 |
| C             | -1.429589000 | 0.648247000  | -0.002182000 | C             | 0.017311000  | -2.151373000 | 0.000000000 |
| C             | -1.130888000 | -0.659253000 | 0.002251000  | C             | -0.624826000 | -0.948782000 | 0.000000000 |
| C             | 1.334932000  | 0.836893000  | 0.002022000  | C             | 1.059965000  | 1.196106000  | 0.000000000 |
| H             | -1.425405000 | -1.700681000 | -0.000215000 | H             | -1.726048000 | -0.892669000 | 0.000000000 |

| 7-c (singlet) |              |              |              | 7-c (triplet) |              |              |              |
|---------------|--------------|--------------|--------------|---------------|--------------|--------------|--------------|
| C             | 0.433917000  | -0.782868000 | 0.000103000  | C             | -0.045358000 | -0.717604000 | 0.018900000  |
| C             | 0.433402000  | 0.782239000  | 0.000103000  | C             | 0.581184000  | 0.849245000  | -0.176241000 |
| C             | -2.095765000 | 0.000335000  | -0.000205000 | C             | -1.389578000 | -0.472422000 | -0.108909000 |
| C             | -0.758767000 | -0.000286000 | 0.000111000  | C             | -0.822119000 | 0.714143000  | 0.189063000  |
| C             | 1.549390000  | 0.000338000  | 0.000131000  | C             | 1.294531000  | -0.260484000 | 0.069681000  |
| C             | 2.626940000  | 0.001457000  | -0.001456000 | H             | 2.288036000  | -0.677269000 | 0.045040000  |

### 7

|   |              |              |              |
|---|--------------|--------------|--------------|
| C | 0.070658000  | -0.704491000 | 0.057290000  |
| C | -0.665815000 | 0.880242000  | 0.131291000  |
| C | 1.532708000  | -0.373288000 | 0.041086000  |
| C | 0.712531000  | 0.670529000  | -0.132252000 |
| C | -1.276678000 | -0.341870000 | -0.107519000 |
| H | -2.240421000 | -0.786732000 | 0.060629000  |

| 7-a (singlet) |              |              |              | 7-a (triplet) |              |              |              |
|---------------|--------------|--------------|--------------|---------------|--------------|--------------|--------------|
| C             | -0.122132000 | -0.786259000 | -0.142310000 | C             | -0.269700000 | -0.911123000 | -0.000148000 |
| C             | 0.703786000  | 0.919253000  | -0.171526000 | C             | 0.887087000  | 0.921365000  | -0.000290000 |
| C             | -1.486340000 | -0.331819000 | -0.002711000 | C             | -1.523921000 | -0.125738000 | -0.000086000 |
| C             | -0.641353000 | 0.730953000  | 0.144804000  | C             | -0.536712000 | 0.744332000  | 0.000273000  |
| C             | 1.190567000  | -0.390076000 | 0.184793000  | C             | 1.108910000  | -0.452868000 | 0.000304000  |
| H             | 2.132827000  | -0.852309000 | -0.078292000 | H             | 2.006008000  | -1.055811000 | -0.000315000 |

| 8-c (singlet) |              |              |              | 8-c (triplet) |              |              |              |
|---------------|--------------|--------------|--------------|---------------|--------------|--------------|--------------|
| C             | 2.491273000  | -0.276567000 | -0.005313000 | C             | 1.294073000  | 0.261083000  | 0.070394000  |
| C             | 0.095852000  | 0.000342000  | 0.002996000  | C             | -0.822841000 | -0.713958000 | 0.188850000  |
| C             | -2.286628000 | 0.471081000  | -0.002314000 | C             | -0.045103000 | 0.717075000  | 0.018353000  |
| C             | -1.211166000 | -0.333439000 | -0.000184000 | C             | -1.389159000 | 0.472558000  | -0.108626000 |
| C             | 1.317151000  | 0.312233000  | 0.005967000  | C             | 0.581528000  | -0.849154000 | -0.176284000 |
| H             | -1.569773000 | -1.384423000 | -0.001154000 | H             | 2.289008000  | 0.674372000  | 0.043883000  |

### 8

|   |              |              |              |
|---|--------------|--------------|--------------|
| C | 0.781711000  | 0.687171000  | 0.101002000  |
| C | -0.090490000 | -0.737019000 | 0.142358000  |
| C | -0.647016000 | 0.715619000  | -0.335212000 |
| C | -1.469246000 | -0.257375000 | 0.143196000  |
| C | 1.231281000  | -0.643263000 | -0.187389000 |
| H | 1.162559000  | 1.409194000  | 0.816269000  |

| 8-a (singlet) |              |              |              | 8-a (triplet) |              |              |              |
|---------------|--------------|--------------|--------------|---------------|--------------|--------------|--------------|
| C             | 0.734833000  | 0.742151000  | 0.019138000  | C             | 1.109736000  | 0.452835000  | -0.000063000 |
| C             | -0.010389000 | -0.723101000 | 0.232822000  | C             | -0.537812000 | -0.744547000 | 0.000160000  |
| C             | -0.672476000 | 0.673941000  | -0.214040000 | C             | -0.268859000 | 0.909372000  | 0.000353000  |
| C             | -1.532704000 | -0.299527000 | 0.028618000  | C             | -1.524084000 | 0.127761000  | -0.000327000 |
| C             | 1.297711000  | -0.634713000 | -0.193681000 | C             | 0.886516000  | -0.921311000 | 0.000001000  |
| H             | 1.098151000  | 1.447491000  | 0.762867000  | H             | 2.007014000  | 1.055342000  | -0.000743000 |

| 9-c (singlet) |              |              | 9-c (triplet) |
|---------------|--------------|--------------|---------------|
| C             | -0.000250000 | 1.089666000  | 0.000000000   |
| C             | 0.000086000  | -0.038918000 | 0.762547000   |
| C             | 0.000086000  | -0.038918000 | -0.762547000  |
| C             | 0.000086000  | -0.687106000 | 1.931886000   |
| C             | 0.000086000  | -0.687106000 | -1.931886000  |
| H             | -0.000571000 | 2.174295000  | 0.000000000   |

Not Available

## 9

|   |              |              |              |
|---|--------------|--------------|--------------|
| C | 0.001123000  | 1.239844000  | 0.000000000  |
| C | -0.000343000 | 0.125031000  | 0.808134000  |
| C | -0.000343000 | 0.125031000  | -0.808134000 |
| C | -0.000343000 | -0.937807000 | 1.578834000  |
| C | -0.000343000 | -0.937807000 | -1.578834000 |
| H | 0.001485000  | 2.314244000  | 0.000000000  |

| 9-a (singlet) |              |              |              | 9-a (triplet) |              |              |              |
|---------------|--------------|--------------|--------------|---------------|--------------|--------------|--------------|
| C             | 0.084149000  | 1.343054000  | 0.000000000  | C             | 0.000047000  | 0.809035000  | 0.000000000  |
| C             | 0.014121000  | 0.126156000  | 0.777273000  | C             | -0.000017000 | 0.040754000  | 1.153701000  |
| C             | 0.014121000  | 0.126156000  | -0.777273000 | C             | -0.000017000 | 0.040754000  | -1.153701000 |
| C             | 0.014121000  | -0.957666000 | 1.477016000  | C             | -0.000017000 | -0.602962000 | 2.251131000  |
| C             | 0.014121000  | -0.957666000 | -1.477016000 | C             | -0.000017000 | -0.602962000 | -2.251131000 |
| H             | -0.843790000 | 1.919791000  | 0.000000000  | C             | 0.000130000  | 1.892278000  | 0.000000000  |

| 10-c (singlet) |              |              | 10-c (triplet) |
|----------------|--------------|--------------|----------------|
| C              | -0.545313000 | 0.956712000  | -0.118081000   |
| C              | 0.529190000  | 0.035607000  | 0.023295000    |
| C              | -1.164493000 | -0.141273000 | 0.417433000    |
| C              | -0.557884000 | -1.139586000 | -0.313954000   |
| C              | 1.863240000  | -0.031186000 | 0.087194000    |
| H              | -0.748443000 | 1.918363000  | -0.575321000   |

Not Available

## 10

|   |              |              |              |
|---|--------------|--------------|--------------|
| C | 0.479130000  | 0.850861000  | 0.092001000  |
| C | -0.641711000 | -0.058495000 | 0.098922000  |
| C | 1.371030000  | -0.094712000 | -0.446777000 |
| C | 0.610022000  | -0.947995000 | 0.334436000  |
| C | -1.919355000 | -0.044128000 | -0.188341000 |
| H | 0.605301000  | 1.766817000  | 0.658554000  |

| 10-a (singlet) |              |              |              | 10-a (triplet) |              |              |              |
|----------------|--------------|--------------|--------------|----------------|--------------|--------------|--------------|
| C              | 0.203822000  | 0.610157000  | 0.179857000  | C              | -0.518979000 | 0.798874000  | 0.080877000  |
| C              | -1.153901000 | 0.479329000  | 0.020353000  | C              | 0.751311000  | -0.042441000 | 0.043187000  |
| C              | 1.180367000  | -0.358642000 | 0.110153000  | C              | -1.664303000 | -0.177105000 | 0.105296000  |
| C              | 2.073421000  | -1.244613000 | 0.046407000  | C              | -0.521245000 | -0.804786000 | -0.151553000 |
| C              | -2.380989000 | 0.362235000  | -0.168340000 | C              | 2.053689000  | -0.049631000 | 0.022160000  |
| H              | 0.581697000  | 1.623882000  | 0.360365000  | H              | -0.602840000 | 1.650531000  | -0.599798000 |

| 11-c (singlet) |              |              |              | 11-c (triplet) |              |              |              |
|----------------|--------------|--------------|--------------|----------------|--------------|--------------|--------------|
| C              | 0.481736000  | 0.734439000  | -0.000082000 | C              | 0.579196000  | 0.808872000  | 0.061748000  |
| C              | 1.750101000  | -0.204701000 | 0.000626000  | C              | 1.463115000  | -0.175221000 | -0.367929000 |
| C              | 0.510459000  | -0.694772000 | -0.000404000 | C              | 0.464595000  | -0.886340000 | 0.310009000  |
| C              | -0.761665000 | -0.094723000 | -0.000709000 | C              | -0.654396000 | -0.066469000 | 0.070410000  |
| H              | 0.659044000  | 1.811144000  | -0.000438000 | H              | 0.708716000  | 1.758134000  | 0.578448000  |
| C              | -2.090471000 | -0.042101000 | 0.000642000  | C              | -1.970630000 | 0.026136000  | -0.170646000 |

# 11

|   |              |              |              |
|---|--------------|--------------|--------------|
| C | 0.501445000  | 0.769262000  | 0.038844000  |
| C | 1.564763000  | -0.129973000 | -0.322162000 |
| C | 0.548907000  | -0.805814000 | 0.277044000  |
| C | -0.719276000 | -0.111540000 | 0.086205000  |
| H | 0.559461000  | 1.725258000  | 0.554610000  |
| C | -1.989083000 | -0.009479000 | -0.172366000 |

| 11-a (singlet) |              |              |              | 11-a (triplet) |              |              |              |
|----------------|--------------|--------------|--------------|----------------|--------------|--------------|--------------|
| C              | 0.286191000  | 0.610036000  | 0.088308000  | C              | 0.553009000  | 0.797825000  | -0.088470000 |
| C              | 1.289949000  | -0.300637000 | 0.004779000  | C              | 1.663600000  | -0.183891000 | -0.094929000 |
| C              | 1.938995000  | -1.359216000 | 0.213232000  | C              | 0.496835000  | -0.799247000 | 0.143836000  |
| C              | -1.126445000 | 0.440052000  | 0.045876000  | C              | -0.757750000 | -0.067471000 | -0.039163000 |
| H              | 0.392863000  | 1.657897000  | 0.383655000  | H              | 0.609770000  | 1.643914000  | 0.602172000  |
| C              | -2.315337000 | 0.389582000  | -0.273675000 | C              | -2.057323000 | -0.021201000 | -0.021636000 |

| 12-c (singlet) |              |              |              | 12-c (triplet) |              |              |              |
|----------------|--------------|--------------|--------------|----------------|--------------|--------------|--------------|
| C              | -0.032720000 | 0.782197000  | 0.092516000  | C              | -0.573199000 | 0.772134000  | 0.085519000  |
| C              | 0.703011000  | -0.703510000 | 0.164334000  | C              | 0.711400000  | -0.000004000 | 0.383297000  |
| C              | -1.343792000 | 0.311749000  | 0.239887000  | C              | -1.587636000 | 0.000001000  | -0.300321000 |
| C              | -0.725884000 | -0.696553000 | -0.438909000 | C              | -0.573197000 | -0.772134000 | 0.085508000  |
| C              | 1.233500000  | 0.540729000  | -0.214878000 | C              | 1.843851000  | 0.000005000  | -0.491439000 |
| H              | 0.995309000  | -1.407672000 | 0.942291000  | H              | 1.072684000  | -0.000018000 | 1.424618000  |

# 12

|   |              |              |              |
|---|--------------|--------------|--------------|
| C | -0.554310000 | 0.754820000  | 0.066317000  |
| C | 0.718337000  | 0.000001000  | 0.343167000  |
| C | -1.698988000 | -0.000009000 | -0.256873000 |
| C | -0.554337000 | -0.754800000 | 0.066336000  |
| C | 1.909080000  | -0.000015000 | -0.450186000 |
| H | 1.081305000  | 0.000016000  | 1.387437000  |

| 12-a (singlet) |              |              |              | 12-a (triplet) |              |              |              |
|----------------|--------------|--------------|--------------|----------------|--------------|--------------|--------------|
| C              | -0.610934000 | 0.807402000  | 0.147881000  | C              | -0.548350000 | 0.752520000  | 0.127651000  |
| C              | 0.768799000  | 0.000826000  | 0.283038000  | C              | 0.748739000  | 0.000087000  | 0.422735000  |
| C              | -1.642896000 | 0.000953000  | -0.339060000 | C              | -1.626420000 | 0.000063000  | -0.362871000 |
| C              | -0.613993000 | -0.808163000 | 0.148471000  | C              | -0.548513000 | -0.752613000 | 0.127809000  |
| C              | 1.891624000  | -0.001143000 | -0.454350000 | C              | 1.805957000  | -0.000099000 | -0.563469000 |
| H              | 1.244400000  | 0.000749000  | 1.284117000  | H              | 1.011521000  | 0.000247000  | 1.488867000  |



| 13-c (singlet) |              |              |              | 13-c (triplet) |              |              |              |
|----------------|--------------|--------------|--------------|----------------|--------------|--------------|--------------|
| C              | -0.577447000 | 1.060208000  | -0.000446000 | C              | 0.159392000  | -0.000004000 | -0.971038000 |
| C              | -0.092011000 | 0.000386000  | 0.960382000  | C              | -0.134378000 | 0.936295000  | 0.151219000  |
| C              | 0.989992000  | 0.001571000  | 0.000017000  | C              | 1.001268000  | 0.000002000  | 0.323258000  |
| C              | -0.091965000 | -0.000579000 | -0.960387000 | C              | -0.134379000 | -0.936296000 | 0.151224000  |
| C              | -0.573990000 | -1.062078000 | 0.000428000  | C              | -1.234910000 | 0.000003000  | 0.254777000  |
| H              | 2.072525000  | 0.002949000  | 0.000042000  | H              | 2.058045000  | 0.000003000  | 0.543359000  |

| 13 |              |              |              |
|----|--------------|--------------|--------------|
| C  | -0.115954000 | 1.159079000  | 0.002841000  |
| C  | 0.094181000  | -0.091866000 | -0.896260000 |
| C  | -0.970929000 | -0.472084000 | -0.001088000 |
| C  | 0.094452000  | -0.096758000 | 0.895739000  |
| C  | 1.238641000  | -0.403542000 | -0.001048000 |
| H  | -2.042342000 | -0.568976000 | -0.001108000 |

| 13-a (singlet) |              |              |              | 13-a (triplet) |              |              |              |
|----------------|--------------|--------------|--------------|----------------|--------------|--------------|--------------|
| C              | -0.056096000 | 0.000801000  | -1.002958000 | C              | 0.081807000  | 0.000330000  | -1.038486000 |
| C              | -0.051700000 | 0.869251000  | 0.502348000  | C              | -0.105929000 | 1.058891000  | 0.165529000  |
| C              | 1.018902000  | -0.000027000 | -0.001396000 | C              | 0.910201000  | -0.000141000 | 0.344564000  |
| C              | -0.051765000 | -0.870018000 | 0.500981000  | C              | -0.106009000 | -1.058981000 | 0.165114000  |
| C              | -1.208908000 | 0.000003000  | 0.001538000  | C              | -1.111470000 | -0.000067000 | 0.295488000  |
| H              | 2.097399000  | -0.000061000 | -0.003076000 | H              | 1.988405000  | -0.000200000 | 0.406748000  |

| 14-c (singlet) |              |              | 14-c (triplet) |
|----------------|--------------|--------------|----------------|
| C              | 2.154857000  | 1.475815000  | 0.000000000    |
| C              | 1.119052000  | 0.657712000  | 0.000000000    |
| C              | 0.129207000  | -0.088840000 | 0.000000000    |
| C              | -0.944786000 | -0.898857000 | 0.000000000    |
| C              | -2.271115000 | -0.737695000 | 0.000000000    |
| H              | -0.802346000 | -2.005959000 | 0.000000000    |
|                |              |              | Not Available  |

| 14 |              |              |             |
|----|--------------|--------------|-------------|
| C  | 2.290311000  | 1.333146000  | 0.000000000 |
| C  | 1.142888000  | 0.672183000  | 0.000000000 |
| C  | 0.000000000  | 0.129691000  | 0.000000000 |
| C  | -1.001114000 | -0.823381000 | 0.000000000 |
| C  | -2.309059000 | -0.992074000 | 0.000000000 |
| H  | -0.738156000 | -1.917390000 | 0.000000000 |

| 14-a (singlet) |              |              | 14-a (triplet) |
|----------------|--------------|--------------|----------------|
| C              | 0.509263000  | 2.625821000  | 0.000000000    |
| C              | 0.257976000  | 1.383265000  | 0.000000000    |
| C              | 0.000000000  | 0.092126000  | 0.000000000    |
| C              | -0.211777000 | -1.160564000 | 0.000000000    |
| C              | -0.591873000 | -2.414882000 | 0.000000000    |
| H              | 0.218463000  | -3.154596000 | 0.000000000    |
|                |              |              | Not Available  |

Table S2: Geometries of transition states involved in the rearrangement scheme in Cartesian coordinates (in Angstrom units) obtained at UB3LYP/6-311+G(d,p) level of theory.

| 16 <sup>z</sup> |             |              |              | 15 <sup>z</sup> |              |              |              |
|-----------------|-------------|--------------|--------------|-----------------|--------------|--------------|--------------|
| C               | 0.6136850   | 0.756814000  | -0.000040000 | C               | -1.5539380   | -0.00248600  | -0.035201000 |
| C               | -0.6356800  | 0.000801000  | 0.000388000  | C               | -0.4577410   | 0.808674000  | 0.026131000  |
| C               | 1.8141350   | 0.000931000  | 0.000075000  | C               | -0.4434770   | -0.802856000 | 0.026274000  |
| C               | 0.6132280   | -0.758917000 | -0.000042000 | C               | 0.7889140    | -0.004746000 | 0.022329000  |
| C               | -1.9096710  | 0.000817000  | -0.000912000 | C               | 2.1037510    | 0.003745000  | -0.032245000 |
| H               | -2.9741740  | -0.002673000 | 0.003189000  | H               | -2.6250630   | -0.013986000 | -0.043729000 |
| TS1             |             |              |              | TS2             |              |              |              |
| C               | 2.50913700  | 0.726004000  | 0.000000000  | C               | 2.50899300   | 0.726582000  | 0.000000000  |
| C               | 1.2427100   | 0.371577000  | 0.000000000  | C               | 1.24256900   | 0.372069000  | 0.000000000  |
| C               | 0.0000000   | 0.135660000  | 0.000000000  | C               | 0.00000000   | 0.135718000  | 0.000000000  |
| C               | -1.1517580  | -0.657290000 | 0.000000000  | C               | -1.15156200  | -0.657460000 | 0.000000000  |
| C               | -2.4128270  | -0.281508000 | 0.000000000  | C               | -2.41280200  | -0.282429000 | 0.000000000  |
| H               | -1.1235790  | -1.766663000 | 0.000000000  | H               | -1.12318900  | -1.766877000 | 0.000000000  |
| TS3             |             |              |              | TS4             |              |              |              |
| C               | -0.79260400 | 0.920476000  | -0.098493000 | C               | -0.52309300  | 0.877537000  | -0.081550000 |
| C               | 0.74540800  | -0.300897000 | -0.066957000 | C               | 0.69853100   | 0.217512000  | -0.064627000 |
| C               | -1.33325500 | -0.141794000 | 0.417591000  | C               | -1.33602600  | -0.167162000 | 0.410657000  |
| C               | -0.36834700 | -1.081632000 | -0.286375000 | C               | -0.62664300  | -1.056560000 | -0.322616000 |
| C               | 1.87937200  | 0.315260000  | 0.168970000  | C               | 1.91814600   | -0.176523000 | 0.145964000  |
| H               | -0.78344200 | 1.731518000  | -0.808415000 | H               | -0.78548500  | 1.831178000  | -0.526973000 |
| TS5             |             |              |              | TS6             |              |              |              |
| C               | 2.4264920   | 0.048210000  | 0.000008000  | C               | 0.59090900   | 0.755781000  | 0.039921000  |
| C               | 1.1418760   | -0.035124000 | -0.000008000 | C               | 1.60827200   | -0.132484000 | -0.293408000 |
| C               | -0.1890430  | -0.015027000 | -0.000005000 | C               | 0.49003300   | -0.781899000 | 0.234980000  |
| C               | -1.3997030  | -0.706501000 | 0.000002000  | C               | -0.77478700  | -0.202985000 | 0.119777000  |
| C               | -1.9045500  | 0.515433000  | 0.000005000  | H               | 0.50202500   | 1.715551000  | 0.536606000  |
| H               | -0.4504350  | 1.158054000  | -0.000012000 | C               | -1.99809700  | 0.075663000  | -0.190704000 |
| TS7             |             |              |              | TS8             |              |              |              |
| C               | -1.80967200 | -0.087461000 | -0.000192000 | C               | -0.569466000 | 1.6487800    | 0.000000000  |
| C               | -0.56933900 | -0.681976000 | -0.000156000 | C               | 0.00000000   | 0.379857000  | 0.000000000  |
| C               | -0.72395600 | 0.845892000  | 0.000036000  | C               | 0.1222950    | -2.269563000 | 0.000000000  |
| C               | 0.68081100  | -0.108940000 | 0.000036000  | C               | -0.1367820   | -1.015887000 | 0.000000000  |
| C               | 1.94556200  | -0.051545000 | 0.000213000  | C               | 0.7810820    | 1.515310000  | 0.000000000  |
| H               | 2.85956100  | 0.504182000  | 0.000372000  | H               | -1.1827790   | -1.550990000 | 0.000000000  |
| TS9             |             |              |              | TS10            |              |              |              |
| C               | -0.22184100 | -0.563224000 | 0.000002000  | C               | -0.585023000 | 0.761374000  | 0.012872000  |
| C               | 1.1628950   | 0.852106000  | -0.000008000 | C               | 0.686201000  | -0.000064000 | 0.048657000  |
| C               | -1.58804700 | -0.342571000 | -0.000008000 | C               | -1.778394000 | 0.000016000  | -0.064409000 |
| C               | -0.84885200 | 0.772360000  | 0.000010000  | C               | -0.58506400  | -0.761361000 | 0.012914000  |
| C               | 1.1685360   | -0.511881000 | 0.000004000  | C               | 2.029288000  | 0.000001000  | -0.188206000 |
| H               | 1.96385300  | -1.240736000 | 0.000003000  | H               | 1.39796200   | 0.000203000  | 1.069027000  |
| TS11            |             |              |              |                 |              |              |              |
|                 | C           | -0.67905100  | 0.831514000  |                 | 0.068742000  |              |              |
|                 | C           | 0.765199000  | -0.061533000 |                 | 0.343962000  |              |              |
|                 | C           | -1.69504400  | -0.117041000 |                 | -0.251041000 |              |              |
|                 | C           | -0.49064600  | -0.690221000 |                 | 0.059547000  |              |              |
|                 | C           | 1.91592700   | 0.041276000  |                 | -0.453339000 |              |              |
|                 | H           | 1.101700000  | -0.023969000 |                 | 1.39277200   |              |              |

Table S3: Point Group, relative zero-point corrected energy ( $\Delta E_0$  in  $\text{kJ mol}^{-1}$ ), dipole moments (in Debye) and rotational constants (in MHz) of  $\text{C}_5\text{H}$  isomers of **1-14** in their ground electronic states calculated at the UB3LYP/6-311+G(d,p) level of theory.

| Isomer | Point group    | $\Delta E_0$<br>( $\text{kJmol}^{-1}$ ) | $ \mu $<br>(Debye) | Rotational Constants (in MHz) |         |         |
|--------|----------------|-----------------------------------------|--------------------|-------------------------------|---------|---------|
|        |                |                                         |                    | $A_e$                         | $B_e$   | $C_e$   |
| 1      | $C_{\infty v}$ | 0                                       | 5.21               | 2400.64                       | 2400.64 | 0       |
| 2      | $C_{2v}$       | 45                                      | 3.68               | 45666.48                      | 3511.17 | 3260.48 |
| 3      | $C_s$          | 105                                     | 4.79               | 37334.32                      | 3635.19 | 3312.64 |
| 4      | $C_s$          | 206                                     | 4.01               | 36025.46                      | 4807.4  | 4241.4  |
| 5      | $C_{2v}$       | 222                                     | 3.01               | 25835.77                      | 3311.94 | 2935.61 |
| 6      | $C_s$          | 249                                     | 2.26               | 28321.5                       | 4124.46 | 3600.16 |
| 7      | $C_l$          | 260                                     | 2.99               | 20315.34                      | 7787.44 | 5708.13 |
| 8      | $C_l$          | 318                                     | 2.51               | 17425.72                      | 8290.86 | 6014.3  |
| 9      | $C_l$          | 320                                     | 4.56               | 11170.93                      | 6693.84 | 4185.69 |
| 10     | $C_l$          | 333                                     | 2.76               | 18357.79                      | 6013.25 | 4949.45 |
| 11     | $C_s$          | 336                                     | 1.72               | 23929.85                      | 5440.15 | 4667.71 |
| 12     | $C_s$          | 422                                     | 2.92               | 24897.01                      | 5066.38 | 4732.01 |
| 13     | $C_l$          | 428                                     | 2.61               | 12494.76                      | 9427.41 | 9102.76 |
| 14     | $C_s$          | 369                                     | 3.06               | 150775.51                     | 2497.43 | 2456.73 |

Table S4: Point Group, relative zero-point corrected energy ( $\Delta E_0$  in  $\text{kJ mol}^{-1}$ ), dipole moments (in Debye) and rotational constants (in MHz) of **cationic counterpart of  $\text{C}_5\text{H}$**  isomers of **1-14** in their singlet ground electronic states calculated at the UB3LYP/6-311+G(d,p) level of theory.

| Isomer | Point group    | $\Delta E_0$<br>( $\text{kJmol}^{-1}$ ) | $ \mu $<br>(Debye) | Rotational Constants (in MHz) |           |           |
|--------|----------------|-----------------------------------------|--------------------|-------------------------------|-----------|-----------|
|        |                |                                         |                    | $A_e$                         | $B_e$     | $C_e$     |
| 1      | $C_{\infty v}$ | 0                                       | 3.89               | 0                             | 2424.0217 | 2424.0217 |
| 2      | $C_{2v}$       | 116                                     | 2.52               | 51117.71                      | 3511.56   | 3285.84   |
| 3      | -              | -                                       | -                  | -                             | -         | -         |
| 4      | -              | -                                       | -                  | -                             | -         | -         |
| 5      | $C_{2v}$       | 377                                     | 2.87               | 16693.11                      | 4879.11   | 3775.57   |
| 6      | -              | -                                       | -                  | -                             | -         | -         |
| 7      | $C_l$          | 230                                     | 3.07               | 34385.67                      | 5064.95   | 4414.67   |
| 8      | $C_l$          | 373                                     | 1.85               | 16572.96                      | 8710.06   | 6394.64   |
| 9      | $C_l$          | 377                                     | 2.87               | 16677.06                      | 4881.58   | 3776.23   |
| 10     | $C_l$          | 424                                     | 3.20               | 14736.66                      | 6920.62   | 5.069.75  |
| 11     | $C_s$          | 406                                     | 1.53               | 31325.19                      | 4929.77   | 4259.44   |
| 12     | $C_s$          | 373                                     | 1.85               | 16559.75                      | 8710.27   | 6395.0    |
| 13     | $C_l$          | 477                                     | 2.04               | 10911.83                      | 10280.12  | 9870.04   |
| 14     | -              | -                                       | -                  | -                             | -         | -         |

Table S5: Point Group, relative zero-point corrected energy ( $\Delta E_0$  in  $\text{kJ mol}^{-1}$ ), dipole moments (in Debye) and rotational constants (in MHz) of **anionic counterpart of  $\text{C}_5\text{H}$**  isomers of **1-14** in their singlet ground electronic states calculated at the UB3LYP/6-311+G(d,p) level of theory.

| Isomer | Point group    | $\Delta E_0$<br>( $\text{kJ mol}^{-1}$ ) | $ \mu $<br>(Debye) | Rotational Constants (in MHz) |         |         |
|--------|----------------|------------------------------------------|--------------------|-------------------------------|---------|---------|
|        |                |                                          |                    | $A_e$                         | $B_e$   | $C_e$   |
| 1      | $C_{\infty v}$ | 0                                        | 5.78               | 0                             | 2385.33 | 2385.33 |
| 2      | $C_{2v}$       | -13                                      | 6.14               | 40325.85                      | 3543.95 | 3257.65 |
| 3      | $C_s$          | -40                                      | 6.02               | 36158.12                      | 3639.95 | 3307.04 |
| 4      | $C_s$          | -13                                      | 6.14               | 40331.95                      | 3543.74 | 3257.52 |
| 5      | $C_{2v}$       | -47                                      | 3.46               | 43591.53                      | 2860.37 | 2684.24 |
| 6      | $C_l$          | 118                                      | 3.95               | 21414.24                      | 5601.81 | 4440.28 |
| 7      | $C_l$          | 209                                      | 2.61               | 17430.55                      | 8358.85 | 5813.74 |
| 8      | $C_l$          | 250                                      | 3.28               | 17744.24                      | 7926.01 | 5750.06 |
| 9      | $C_s$          | 247                                      | 3.31               | 10421.46                      | 7470.26 | 4411.59 |
| 10     | -              | -                                        | -                  | -                             | -       | -       |
| 11     | -              | -                                        | -                  | -                             | -       | -       |
| 12     | $C_l$          | 374                                      | 2.23               | 22351.59                      | 5056.85 | 4651.45 |
| 13     | $C_l$          | 252                                      | 4.32               | 13937.06                      | 9613.24 | 9606.09 |
| 14     | $C_s$          | -45                                      | 3.52               | 602046.3                      | 2410.3  | 2400.69 |

Table S6: Point Group, relative zero-point corrected energy ( $\Delta E_0$  in  $\text{kJ mol}^{-1}$ ), dipole moments (in Debye) and rotational constants (in MHz) of **cationic counterpart of  $\text{C}_5\text{H}$**  isomers of **1-14** in their triplet ground electronic states calculated at the UB3LYP/6-311+G(d,p) level of theory.

| Isomer | Point group    | $\Delta E_0$<br>( $\text{kJ mol}^{-1}$ ) | $ \mu $<br>(Debye) | Rotational Constants (in MHz) |          |          |
|--------|----------------|------------------------------------------|--------------------|-------------------------------|----------|----------|
|        |                |                                          |                    | $A_e$                         | $B_e$    | $C_e$    |
| 1      | $C_{\infty v}$ | 0                                        | 6.37               | 0                             | 23819.44 | 2381.944 |
| 2      | $C_{2v}$       | 171                                      | 3.50               | 49294.59                      | 3358.99  | 3144.7   |
| 3      | $C_s$          | 224                                      | 5.73               | 36284.2                       | 3516.49  | 3205.8   |
| 4      | -              | -                                        | -                  | -                             | -        | -        |
| 5      | $C_{2v}$       | 187                                      | 3.69               | 24963.15                      | 3296.15  | 2911.69  |
| 6      | $C_s$          | 281                                      |                    | 28668.91                      | 4020.32  | 3525.88  |
| 7      | $C_l$          | 307                                      | 2.07               | 16623.64                      | 8347.91  | 5557.23  |
| 8      | $C_l$          | 307                                      | 2.07               | 16640.34                      | 8344.02  | 5557.37  |
| 9      | $C_s$          | 187                                      | 3.68               | 25055.00                      | 3290.94  | 2908.86  |
| 10     | $C_l$          | 360                                      | 2.67               | 26026.44                      | 5140.92  | 4353.16  |
| 11     | $C_l$          | 359                                      | 2.61               | 26226.99                      | 5121.26  | 4341.73  |
| 12     | $C_l$          | 432                                      | 3.57               | 21336.16                      | 5266.24  | 5081.01  |
| 13     | $C_l$          | 473                                      | 2.42               | 11727.24                      | 11163.52 | 9024.51  |
| 14     | -              | -                                        | -                  | -                             | -        | -        |

Table S7: Point Group, relative zero-point corrected energy ( $\Delta E_0$  in  $\text{kJ mol}^{-1}$ ), dipole moments (in Debye) and rotational constants (in MHz) of **anionic counterpart of  $\text{C}_5\text{H}$**  isomers of **1-14** in their triplet ground electronic states calculated at the UB3LYP/6-311+G(d,p) level of theory.

| Isomer | Point group    | $\Delta E_0$<br>( $\text{kJmol}^{-1}$ ) | $ \mu $<br>(Debye) | Rotational Constants (in MHz) |          |          |
|--------|----------------|-----------------------------------------|--------------------|-------------------------------|----------|----------|
|        |                |                                         |                    | $A_e$                         | $B_e$    | $C_e$    |
| 1      | $C_{\infty v}$ | 0                                       | 0.84               | 0                             | 2448.696 | 2448.696 |
| 2      | $C_{2v}$       | 17                                      | 0.84               | 46241.09                      | 3523.06  | 3273.65  |
| 3      | $C_s$          | 79                                      | 1.77               | 37291.38                      | 3732.12  | 3392.59  |
| 4      | $C_s$          | 149                                     | 1.66               | 35405.3                       | 4968.99  | 4357.44  |
| 5      | $C_{2v}$       | 240                                     | 0.47               | 35783.87                      | 3085.94  | 2840.94  |
| 6      | $C_l$          | 241                                     | 1.90               | 26336.91                      | 4353.82  | 3736.18  |
| 7      | $C_l$          | 185                                     | 1.67               | 19556.77                      | 8185.91  | 5906.54  |
| 8      | $C_l$          | 186                                     | 1.67               | 19566.52                      | 8186.74  | 5907.77  |
| 9      | -              | -                                       | -                  | -                             | -        | -        |
| 10     | -              | -                                       | -                  | -                             | -        | -        |
| 11     | $C_l$          | 298                                     | 1.91               | 20788.04                      | 5738.46  | 4795.82  |
| 12     | $C_l$          | 386                                     | 1.50               | 22754.71                      | 5372.05  | 5029.5   |
| 13     | $C_l$          | 412                                     | 1.12               | 14370.05                      | 10218.22 | 8965.58  |
| 14     | -              | -                                       | -                  | -                             | -        | -        |

Table S8: Point Group, relative zero-point corrected energy ( $\Delta E_0$  in  $\text{kJ mol}^{-1}$ ), dipole moments (in Debye) and rotational constants (in MHz) of  $\text{C}_5\text{H}$  isomers of **1-14** in their ground electronic states calculated at the UωB97XD/6-311+G(d,p) level of theory.

| Isomer | Point group    | $\Delta E_0$<br>( $\text{kJmol}^{-1}$ ) | $ \mu $<br>(Debye) | Rotational Constants (in MHz) |         |         |
|--------|----------------|-----------------------------------------|--------------------|-------------------------------|---------|---------|
|        |                |                                         |                    | $A_e$                         | $B_e$   | $C_e$   |
| 1      | $C_{\infty v}$ | 0                                       | 3.52               | 0                             | 2430.59 | 2430.59 |
| 2      | $C_{2v}$       | 96                                      | 2.25               | 51373.08                      | 3519.8  | 3294.11 |
| 3      | $C_s$          | -1                                      | 3.52               | 99174.29                      | 2430.96 | 2430.96 |
| 4      | -              | -                                       | -                  | -                             | -       | -       |
| 5      | $C_{2v}$       | 353                                     | 2.92               | 16758.43                      | 4933.95 | 3811.72 |
| 6      | -              | -                                       | -                  | -                             | -       | -       |
| 7      | $C_l$          | 183                                     | 3.09               | 35178.78                      | 5060.45 | 4424.05 |
| 8      | $C_l$          | 328                                     | 1.91               | 16327.18                      | 8847.45 | 6485.99 |
| 9      | $C_s$          | 353                                     | 2.92               | 16776.45                      | 4931.82 | 3811.38 |
| 10     | $C_l$          | 381                                     | 3.55               | 14416.41                      | 7088.69 | 5104.17 |
| 11     | -              | -                                       | -                  | -                             | -       | -       |
| 12     | $C_l$          | 329                                     | 1.91               | 16341.8                       | 8844.39 | 6485.52 |
| 13     | $C_l$          | 427                                     | 2.13               | 10856.86                      | 10301.3 | 9771.37 |
| 14     | -              | -                                       | -                  | -                             | -       | -       |

Table S9: Point Group, relative zero-point corrected energy ( $\Delta E_0$  in kJ mol<sup>-1</sup>), dipole moments (in Debye) and rotational constants (in MHz) of **cationic counterpart of C<sub>5</sub>H** isomers of **1-14** in their singlet ground electronic states calculated at the UωB97XD/6-311+G(d,p) level of theory.

| Isomer | Point group           | $\Delta E_0$<br>(kJmol <sup>-1</sup> ) | $\mu$  <br>(Debye) | Rotational Constants (in MHz) |                |                |
|--------|-----------------------|----------------------------------------|--------------------|-------------------------------|----------------|----------------|
|        |                       |                                        |                    | A <sub>e</sub>                | B <sub>e</sub> | C <sub>e</sub> |
| 1      | <i>C<sub>∞v</sub></i> | 0                                      | 5.10               | 0                             | 2402.355       | 2402.355       |
| 2      | <i>C<sub>2v</sub></i> | 18                                     | 3.62               | 45743.59                      | 3518.23        | 3266.96        |
| 3      | <i>C<sub>s</sub></i>  | 87                                     | 4.75               | 37394.19                      | 3649.39        | 3324.9         |
| 4      | <i>C<sub>s</sub></i>  | 169                                    | 4.04               | 36843.01                      | 4815.12        | 4258.55        |
| 5      | <i>C<sub>2v</sub></i> | 221                                    | 3.97               | 18479.81                      | 3881.74        | 3207.91        |
| 6      | <i>C<sub>s</sub></i>  | 214                                    | 2.28               | 27890.76                      | 4190.06        | 3642.8         |
| 7      | <i>C<sub>1</sub></i>  | 247                                    | 3.21               | 20672.79                      | 7747.7         | 5718.67        |
| 8      | <i>C<sub>1</sub></i>  | 277                                    | 3.11               | 17050.58                      | 8414.56        | 5993.23        |
| 9      | <i>C<sub>s</sub></i>  | -                                      | -                  | -                             | -              | -              |
| 10     | <i>C<sub>1</sub></i>  | 299                                    | 2.92               | 18180.39                      | 6091.22        | 5001.5         |
| 11     | <i>C<sub>1</sub></i>  | 299                                    | 1.72               | 24078.83                      | 5435.9         | 4671.26        |
| 12     | <i>C<sub>1</sub></i>  | 380                                    | 3.05               | 25276.97                      | 5080.87        | 4770.67        |
| 13     | <i>C<sub>1</sub></i>  | 386                                    | 2.74               | 12572.83                      | 9431.37        | 9136.37        |
| 14     | <i>C<sub>s</sub></i>  | 360                                    | 3.16               | 150775.7                      | 2497.43        | 2456.73        |

Table S10: Point Group, relative zero-point corrected energy ( $\Delta E_0$  in kJ mol<sup>-1</sup>), dipole moments (in Debye) and rotational constants (in MHz) of **anionic counterpart of C<sub>5</sub>H** isomers of **1-14** in their singlet ground electronic states calculated at the UωB97XD/6-311+G(d,p) level of theory.

| Isomer | Point group           | $\Delta E_0$<br>(kJmol <sup>-1</sup> ) | $\mu$  <br>(Debye) | Rotational Constants (in MHz) |                |                |
|--------|-----------------------|----------------------------------------|--------------------|-------------------------------|----------------|----------------|
|        |                       |                                        |                    | A <sub>e</sub>                | B <sub>e</sub> | C <sub>e</sub> |
| 1      | <i>C<sub>1</sub></i>  | 0                                      | 0.26               | 845742.88                     | 2465.14        | 2458.2         |
| 2      | <i>C<sub>2v</sub></i> | -1                                     | 0.41               | 46399.69                      | 3539.28        | 3288.45        |
| 3      | <i>C<sub>s</sub></i>  | 54                                     | 1.88               | 37428.44                      | 3742.04        | 3401.92        |
| 4      | <i>C<sub>s</sub></i>  | 121                                    | 1.64               | 36002.72                      | 4967.21        | 4364.99        |
| 5      | <i>C<sub>2v</sub></i> | 233                                    | 0.55               | 33343.49                      | 3144.87        | 2873.82        |
| 6      | <i>C<sub>1</sub></i>  | 209                                    | 2.01               | 25892.63                      | 4440.17        | 3790.21        |
| 7      | <i>C<sub>1</sub></i>  | 148                                    | 1.66               | 19711.41                      | 8178.18        | 5913.82        |
| 8      | <i>C<sub>1</sub></i>  | 148                                    | 1.66               | 19723.99                      | 8182.8         | 5917.7         |
| 9      | <i>C<sub>s</sub></i>  | 282                                    | 2.89               | 14095.66                      | 4733.26        | 3567.41        |
| 10     | <i>C<sub>1</sub></i>  | 267                                    | 2.02               | 20273.96                      | 5822.13        | 4862.72        |
| 11     | <i>C<sub>s</sub></i>  | 182                                    | 2.09               | 21182.92                      | 7605.27        | 5596.11        |
| 12     | <i>C<sub>1</sub></i>  | 351                                    | 1.58               | 23329.77                      | 5347.23        | 5017.2         |
| 13     | <i>C<sub>1</sub></i>  | 330                                    | 1.55               | 13481.62                      | 10537.56       | 9479.3         |
| 14     | -                     | -                                      | -                  | -                             | -              | -              |

Table S11: Point Group, relative zero-point corrected energy ( $\Delta E_0$  in kJ mol<sup>-1</sup>), dipole moments (in Debye) and rotational constants (in MHz) of **cationic counterpart of C<sub>5</sub>H** isomers of **1-14** in their triplet ground electronic states calculated at the UωB97XD/6-311+G(d,p) level of theory.

| Isomer | Point group    | $\Delta E_0$<br>(kJmol <sup>-1</sup> ) | $\mu$  <br>(Debye) | Rotational Constants (in MHz) |                |                |
|--------|----------------|----------------------------------------|--------------------|-------------------------------|----------------|----------------|
|        |                |                                        |                    | A <sub>e</sub>                | B <sub>e</sub> | C <sub>e</sub> |
| 1      | $C_{\infty v}$ | 0                                      | 6.02               | 0                             | 2389.25        | 2389.25        |
| 2      | $C_{2v}$       | -45                                    | 6.57               | 40101.87                      | 3553.05        | 3263.87        |
| 3      | $C_s$          | -74                                    | 6.25               | 36171.24                      | 3654.43        | 3319.09        |
| 4      | -              | -                                      | -                  | -                             | -              | -              |
| 5      | $C_{2v}$       | -58                                    | 3.58               | 42885.56                      | 2881.35        | 2699.95        |
| 6      | -              | -                                      | -                  | -                             | -              | -              |
| 7      | $C_l$          | 163                                    | 2.84               | 17878.56                      | 8267.65        | 5831.49        |
| 8      | $C_l$          | 198                                    | 3.41               | 17768.96                      | 7912.77        | 5757.66        |
| 9      | $C_s$          | -58                                    | 3.58               | 42826.26                      | 2882.76        | 2700.95        |
| 10     | $C_l$          | -58                                    | 3.72               | 38824.52                      | 2931.17        | 2725.64        |
| 11     | -              | -                                      | -                  | -                             | -              | -              |
| 12     | -              | -                                      | -                  | -                             | -              | -              |
| 13     | $C_l$          | 187                                    | 4.46               | 13927.33                      | 9622.22        | 9620.93        |
| 14     | $C_s$          | 444                                    | 4.36               | 150775.68                     | 2497.43        | 2456.73        |

Table S12: Point Group, relative zero-point corrected energy ( $\Delta E_0$  in kJ mol<sup>-1</sup>), dipole moments (in Debye) and rotational constants (in MHz) of **anionic counterpart of C<sub>5</sub>H** isomers of **1-14** in their triplet ground electronic states calculated at the UωB97XD/6-311+G(d,p) level of theory.

| Isomer | Point group    | $\Delta E_0$<br>(kJmol <sup>-1</sup> ) | $\mu$  <br>(Debye) | Rotational Constants (in MHz) |                |                |
|--------|----------------|----------------------------------------|--------------------|-------------------------------|----------------|----------------|
|        |                |                                        |                    | A <sub>e</sub>                | B <sub>e</sub> | C <sub>e</sub> |
| 1      | $C_{\infty v}$ | 0                                      | 6.71               | 0                             | 2383.11        | 2383.11        |
| 2      | $C_{2v}$       | 155                                    | 3.81               | 49528.57                      | 3356.48        | 3143.45        |
| 3      | $C_s$          | 212                                    | 5.93               | 39660.42                      | 3418.05        | 3146.84        |
| 4      | $C_s$          | 312                                    | 4.46               | 27755.89                      | 4894.65        | 4160.89        |
| 5      | $C_{2v}$       | 187                                    | 4.53               | 19.63624                      | 3699.07        | 3112.7         |
| 6      | $C_s$          | 257                                    | 2.98               | 28568.2                       | 4049.78        | 3546.97        |
| 7      | $C_l$          | 272                                    | 2.09               | 16667.4                       | 8382.96        | 5577.65        |
| 8      | $C_l$          | 272                                    | 2.09               | 16661.09                      | 8383.54        | 5577.2         |
| 9      | $C_s$          | 187                                    | 3.60               | 29043.43                      | 3077.83        | 2783.64        |
| 10     | $C_l$          | 330                                    | 2.84               | 25890.05                      | 5149.14        | 4360.12        |
| 11     | $C_l$          | 330                                    | 2.84               | 25875.33                      | 5148.48        | 4359.3         |
| 12     | $C_l$          | 395                                    | 3.85               | 22148.85                      | 5224.17        | 5035.78        |
| 13     | $C_l$          | 423                                    | 2.38               | 11794.18                      | 11260.81       | 9058.1         |
| 14     | $C_s$          | 426                                    | 4.73               | 150775.68                     | 2497.43        | 2456.73        |

Table S13: Ionization Potential (IP, in eV) and Electron Affinity (EA, in eV) of Isomer **6** to **14** calculated at different level of theory.

| Energy Parameter | Methods                  | 6-c | 6-a  | 7-c  | 7-a  | 8-c  | 8-a  | 9-c  | 9-a  | 10-c | 10-a | 11-c | 11-a | 12-c | 12-a | 13-c | 13-a | 14-c | 14-a |
|------------------|--------------------------|-----|------|------|------|------|------|------|------|------|------|------|------|------|------|------|------|------|------|
| IP               | UB3LYP/<br>6-311+G(d,p)  | --- | ---  | 7.97 | ---  | 8.85 | ---  | 8.88 | ---  | 9.22 | ---  | 9.02 | ---  | 7.77 | ---  | 8.79 | ---  | ---  | ---  |
|                  | UωB97XD/<br>6-311+G(d,p) | --- | ---  | 7.99 | ---  | 8.88 | ---  | 9.71 | ---  | 9.19 | ---  | ---  | ---  | 7.82 | ---  | 8.78 | ---  | ---  | ---  |
| EA               | UB3LYP/<br>6-311+G(d,p)  | --- | 3.49 | ---  | 2.68 | ---  | 2.85 | ---  | 2.90 | ---  | ---  | ---  | ---  | ---  | 2.65 | ---  | 3.98 | ---  | 6.44 |
|                  | UωB97XD/<br>6-311+G(d,p) | --- | ---  | ---  | 2.68 | ---  | 2.92 | ---  | 5.00 | ---  | 5.81 | ---  | ---  | ---  | ---  | ---  | 4.17 | ---  | 1.24 |



Figure S1: Optimized geometries of isomers **13** to **16** of the C<sub>5</sub>H radicals.

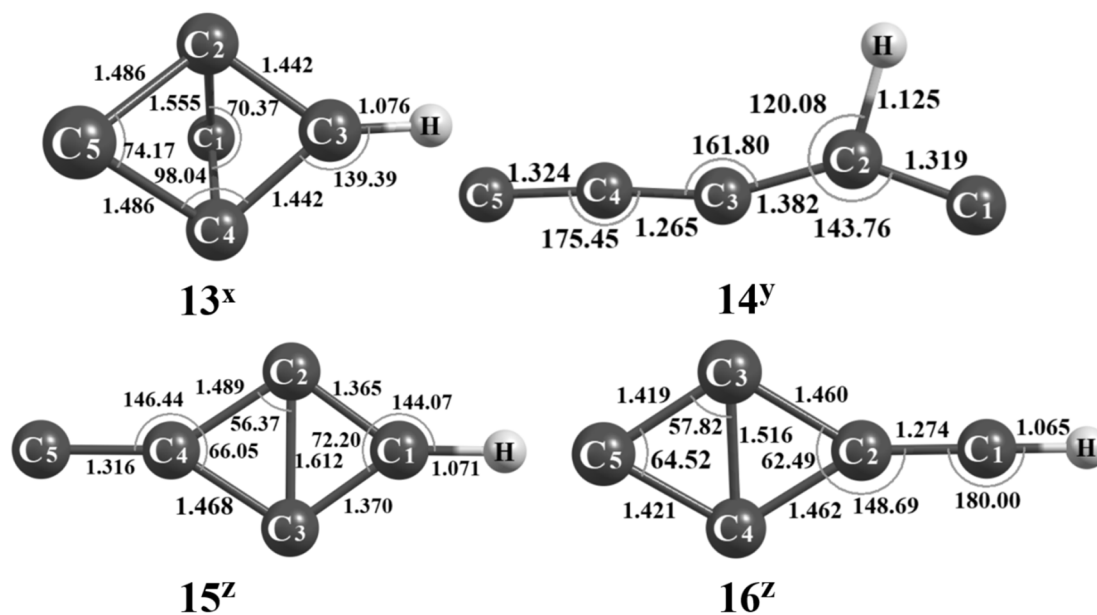

<sup>x</sup> represents the isomer calculated at UB3LYP/6-311+G(d,p) level of theory.

<sup>y</sup> represents the isomer calculated at UB3LYP/6-31+G level of theory.

<sup>z</sup> represents the transition state calculated at UB3LYP/6-311+G(d,p) level of theory.

Figure S2: Intrinsic Reaction Coordinate for the transition state  $15^z$  and  $16^z$  calculated at UB3LYP/6-311+G(d,p) level of theory.

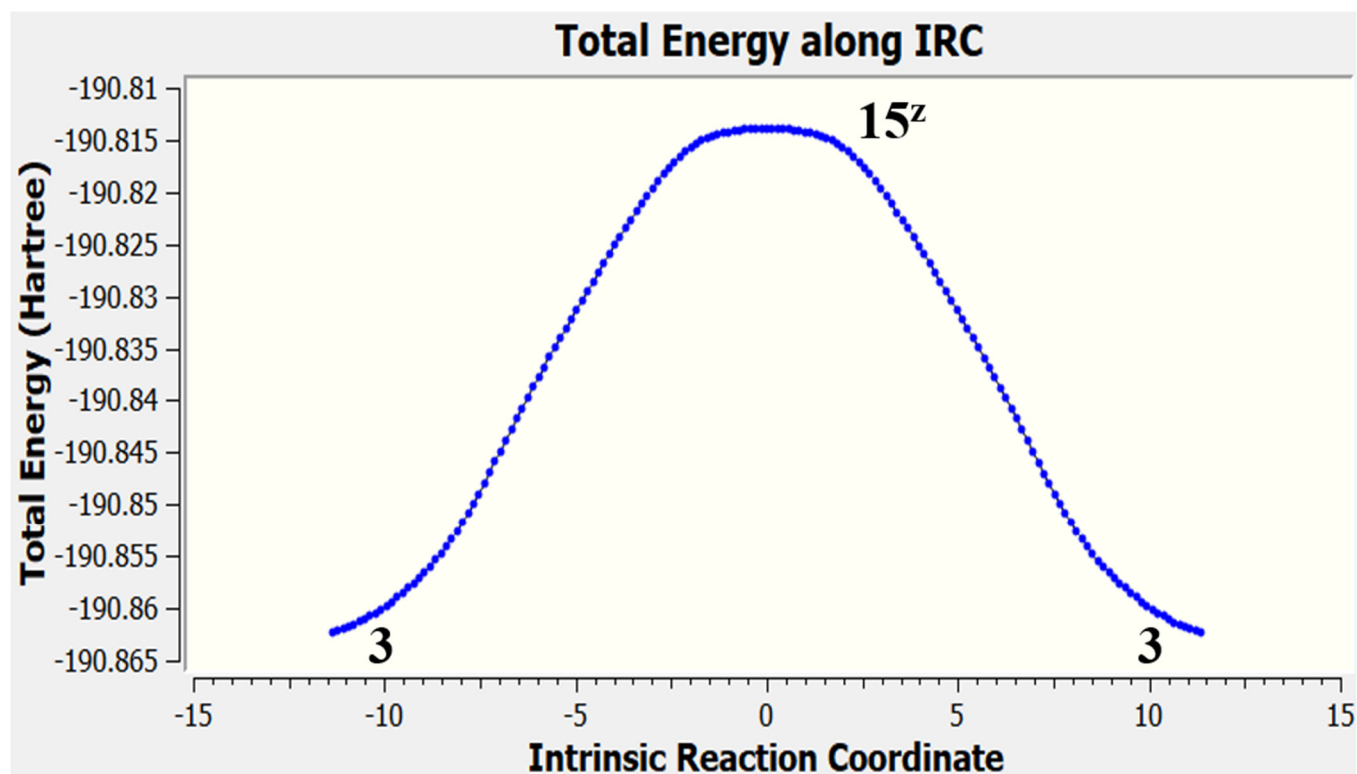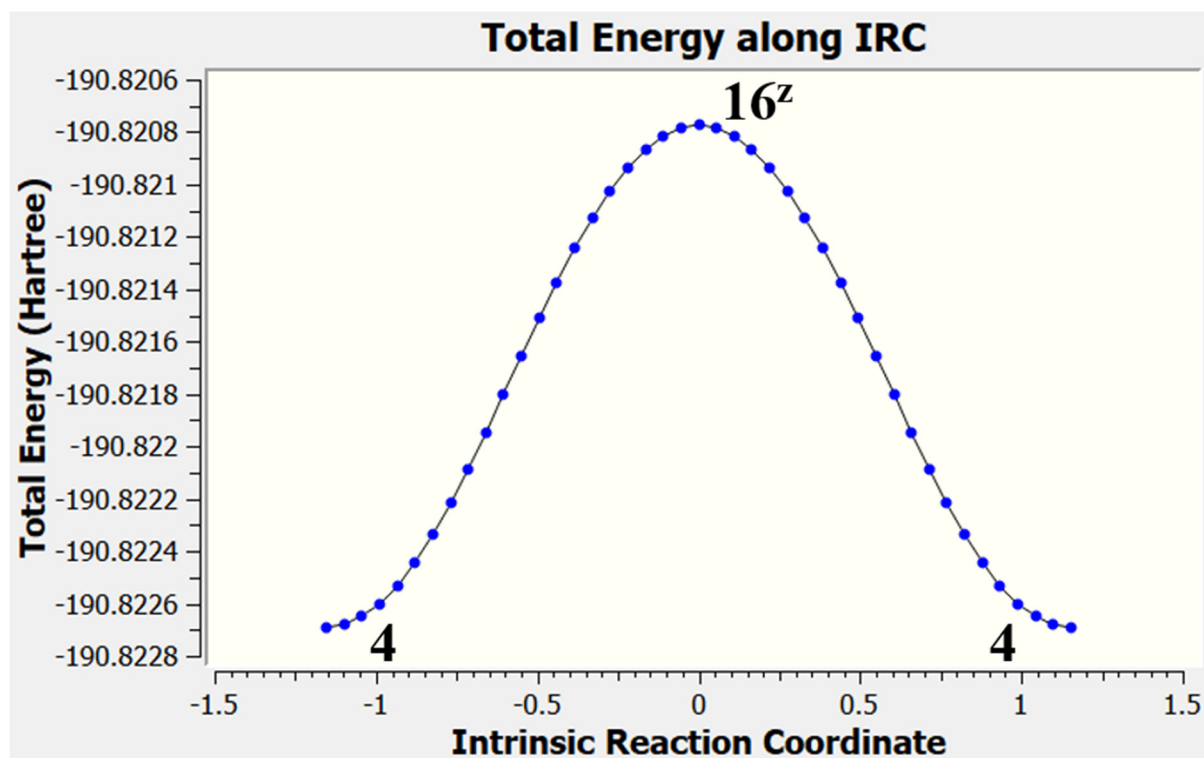

Figure S3: Intrinsic Reaction Coordinate for the rearrangement from **3** to **1** and **10** to **1** calculated at UB3LYP/6-311+G(d,p) level of theory.

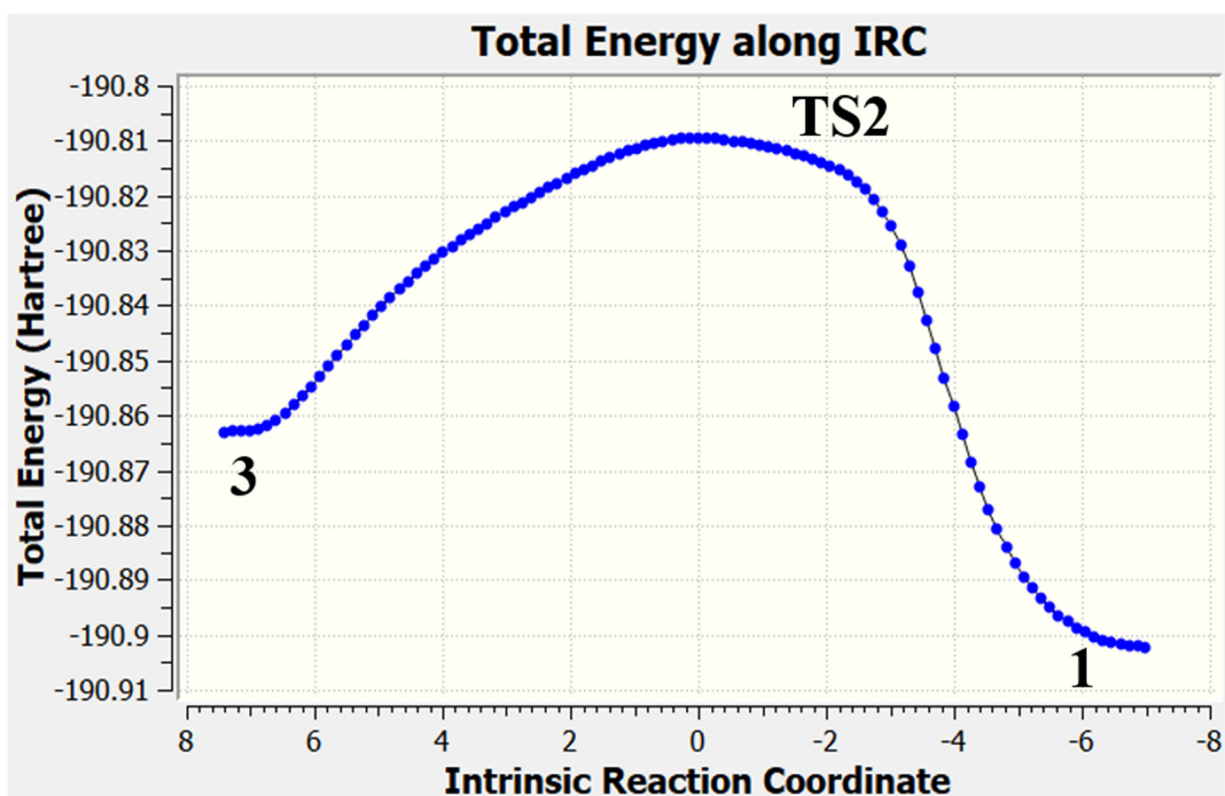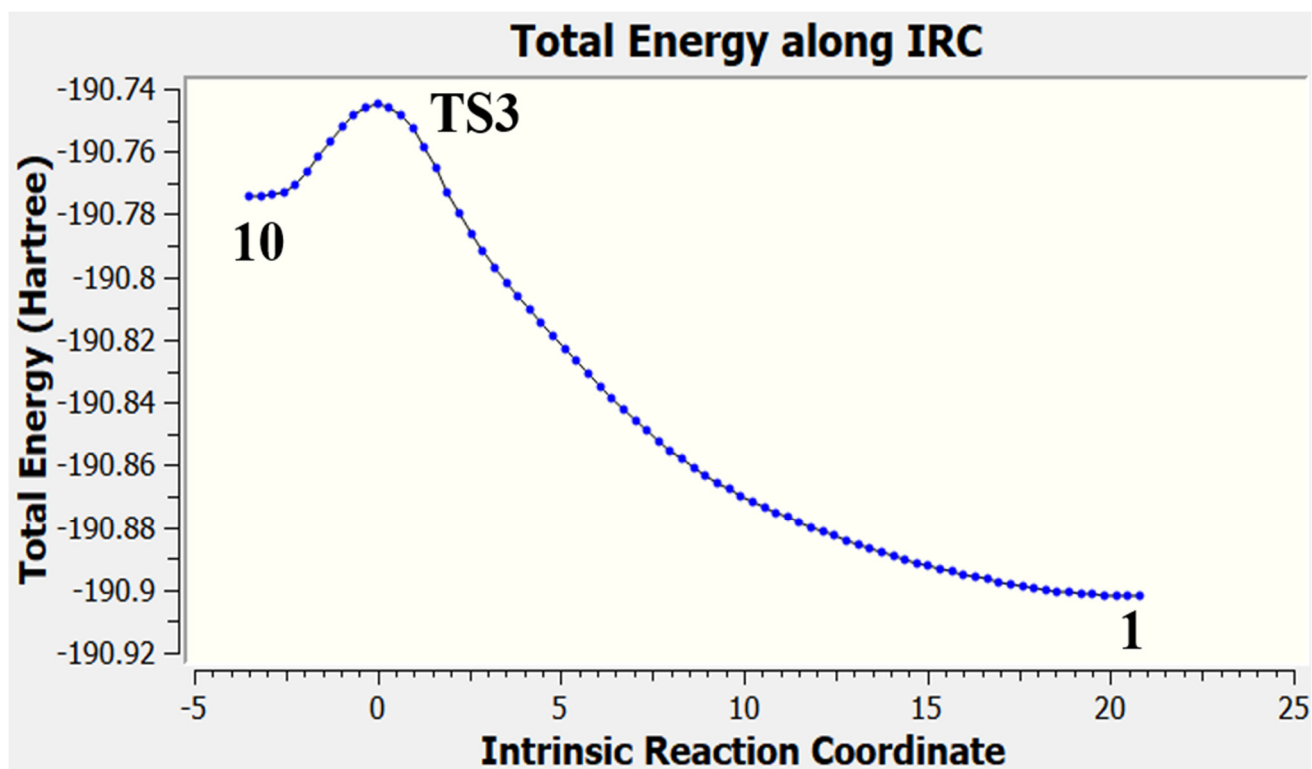

Figure S4: Intrinsic Reaction Coordinate for the rearrangement from **10** to **5** and **5** to **3** calculated at UB3LYP/6-311+G(d,p) level of theory.

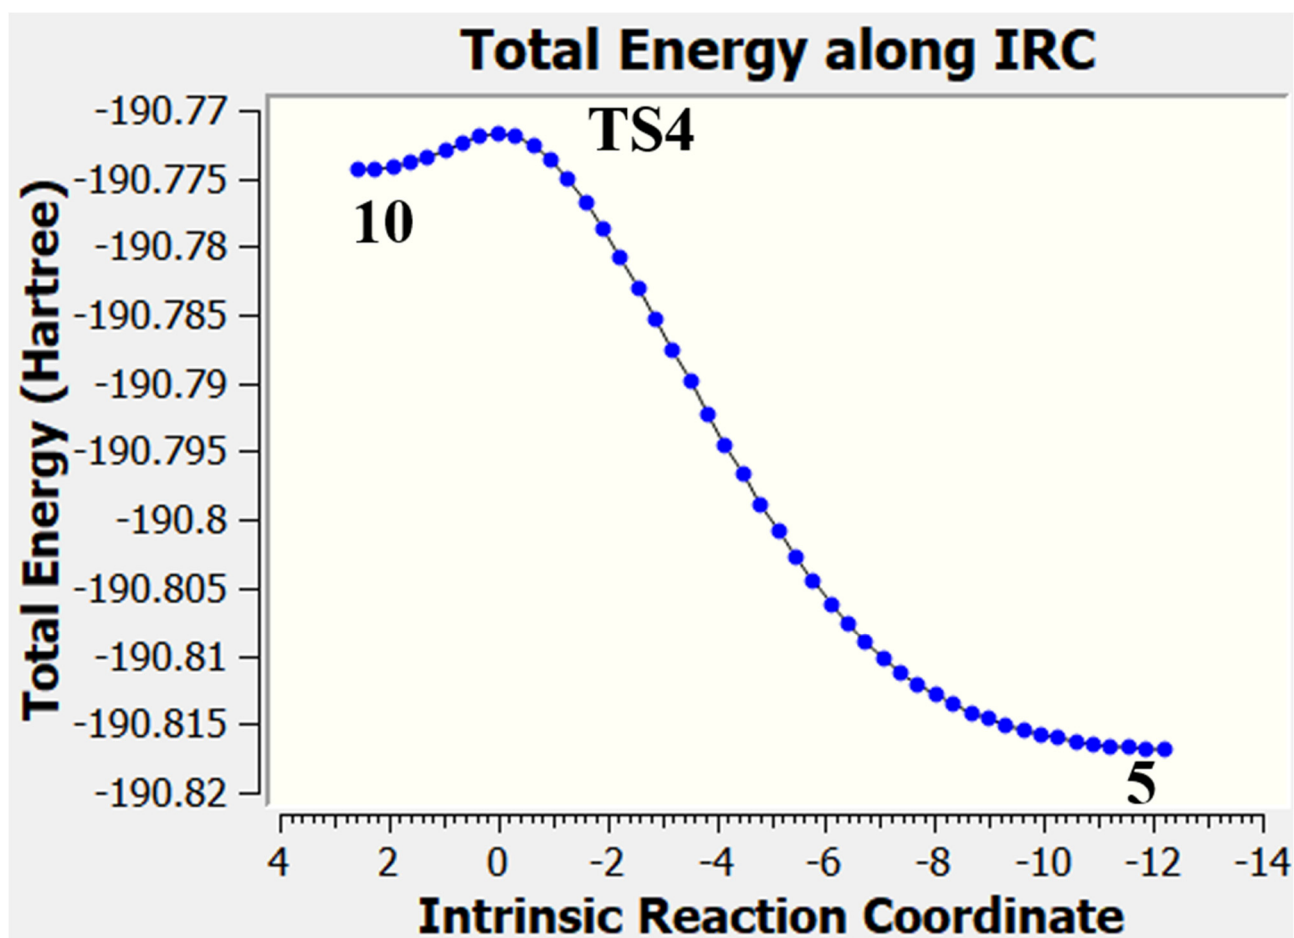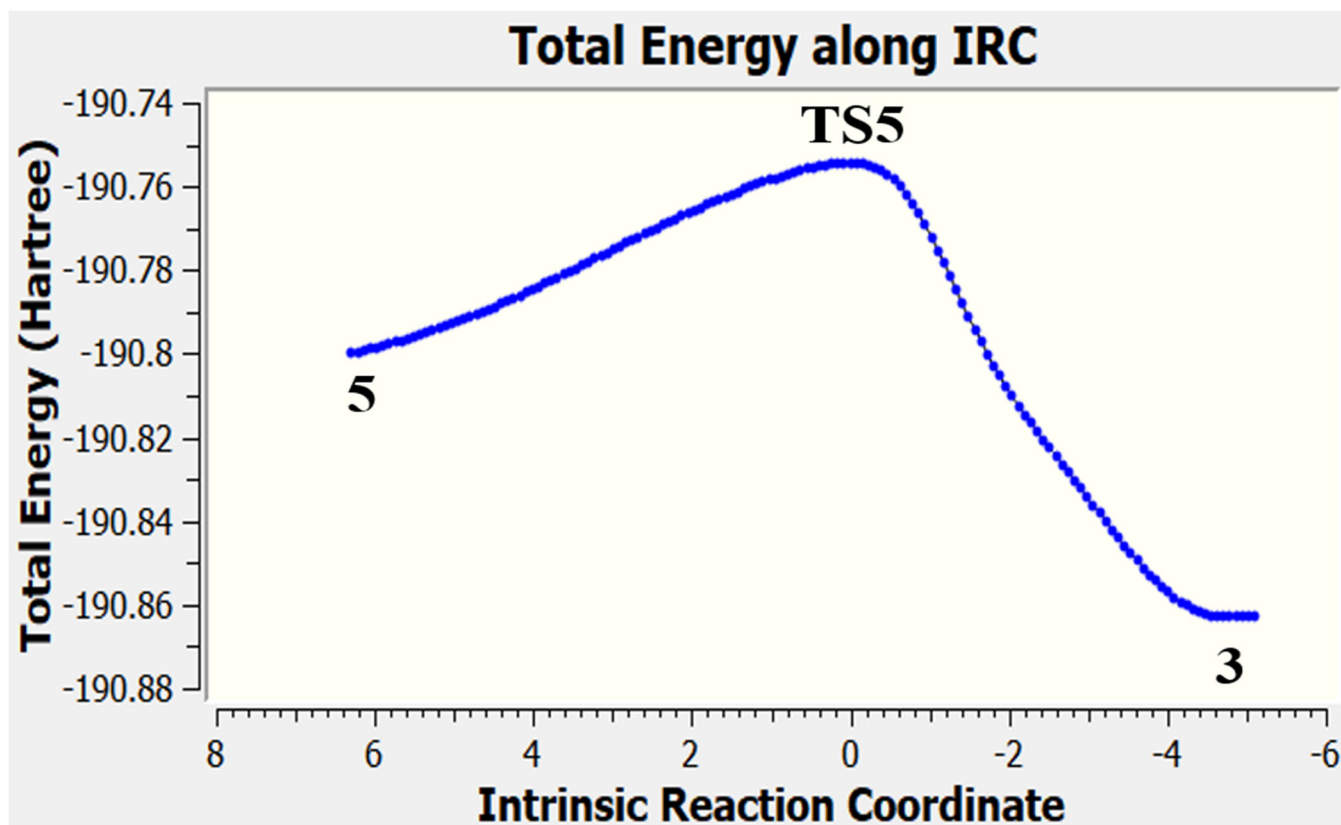

Figure S5: Intrinsic Reaction Coordinate for the rearrangement from **10** to **5** and **4** to **2** calculated at UB3LYP/6-311+G(d,p) level of theory.

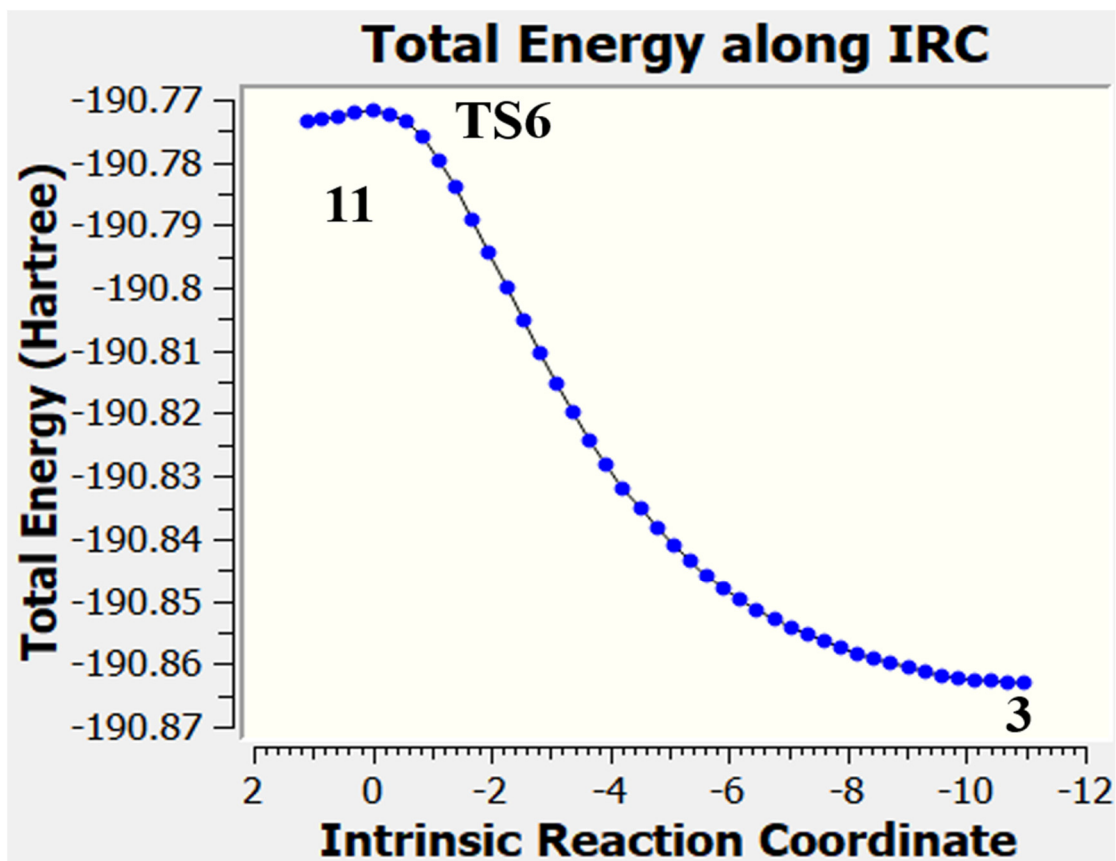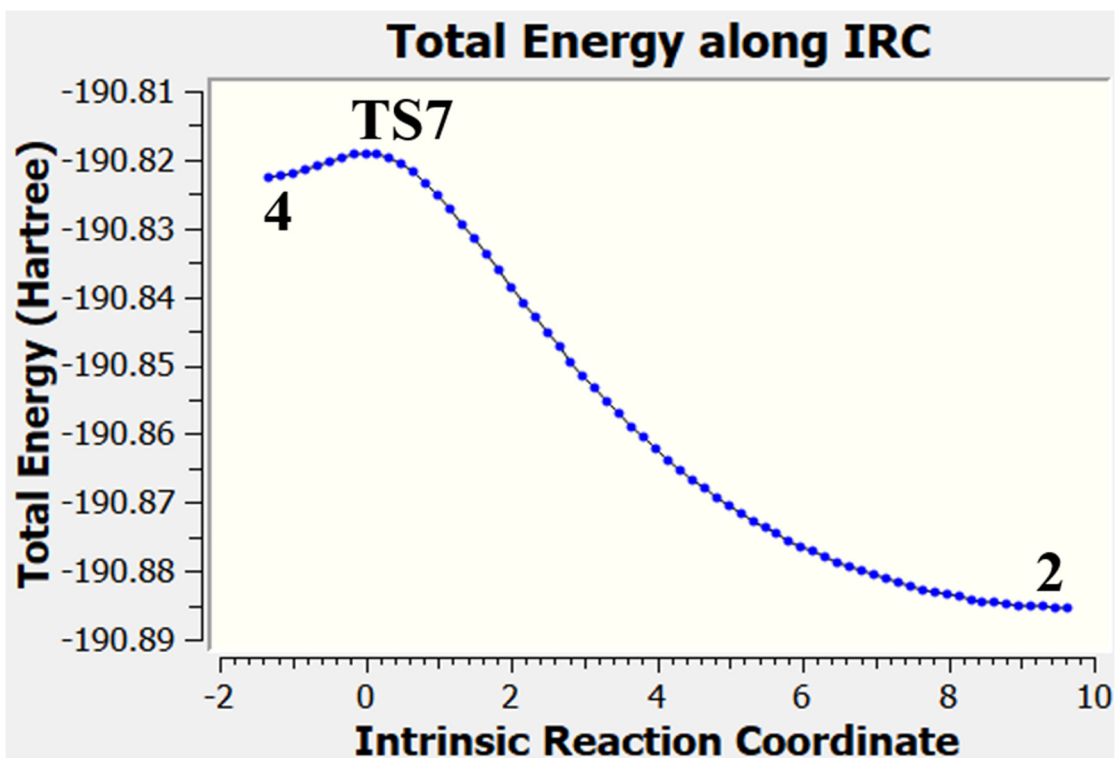

Figure S6: Intrinsic Reaction Coordinate for the rearrangement from **6** to **2** and **10** to **5** calculated at UB3LYP/6-311+G(d,p) level of theory.

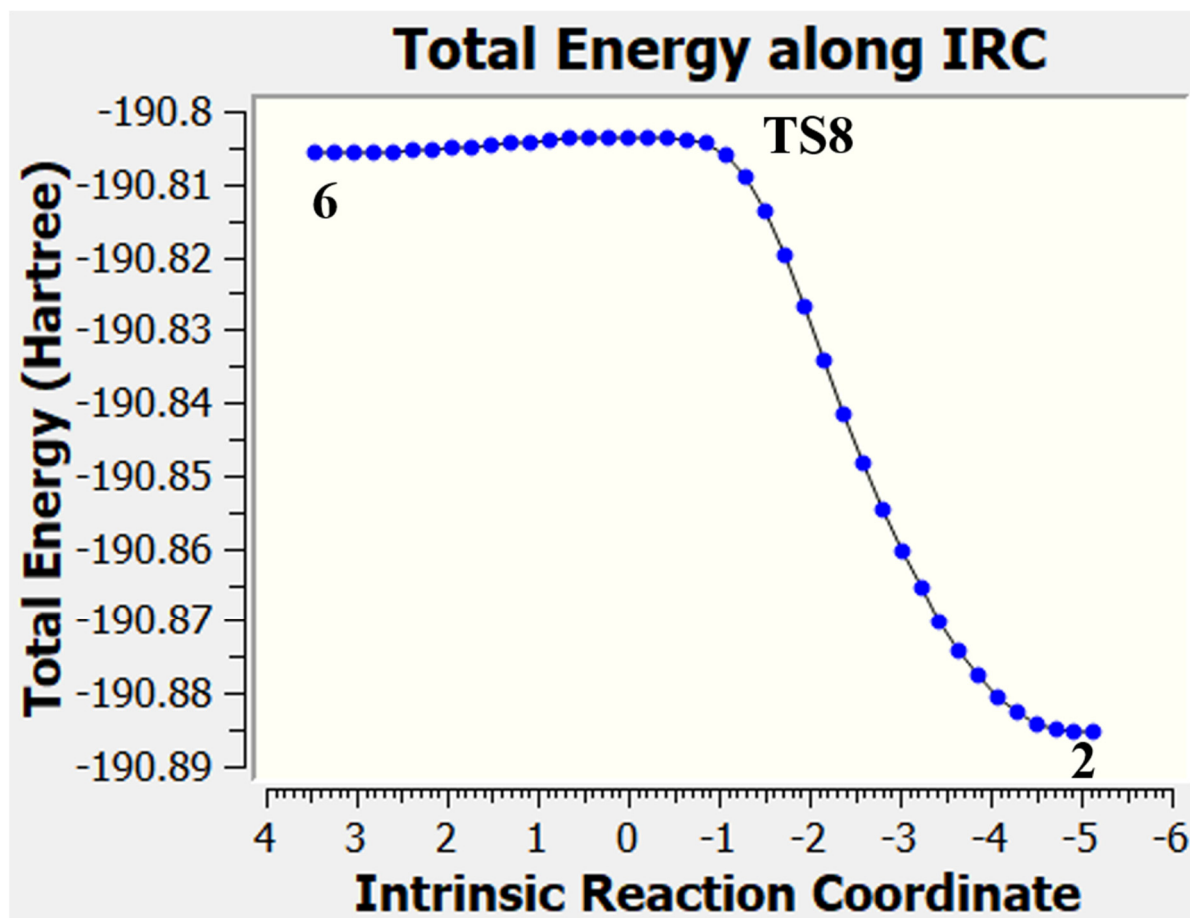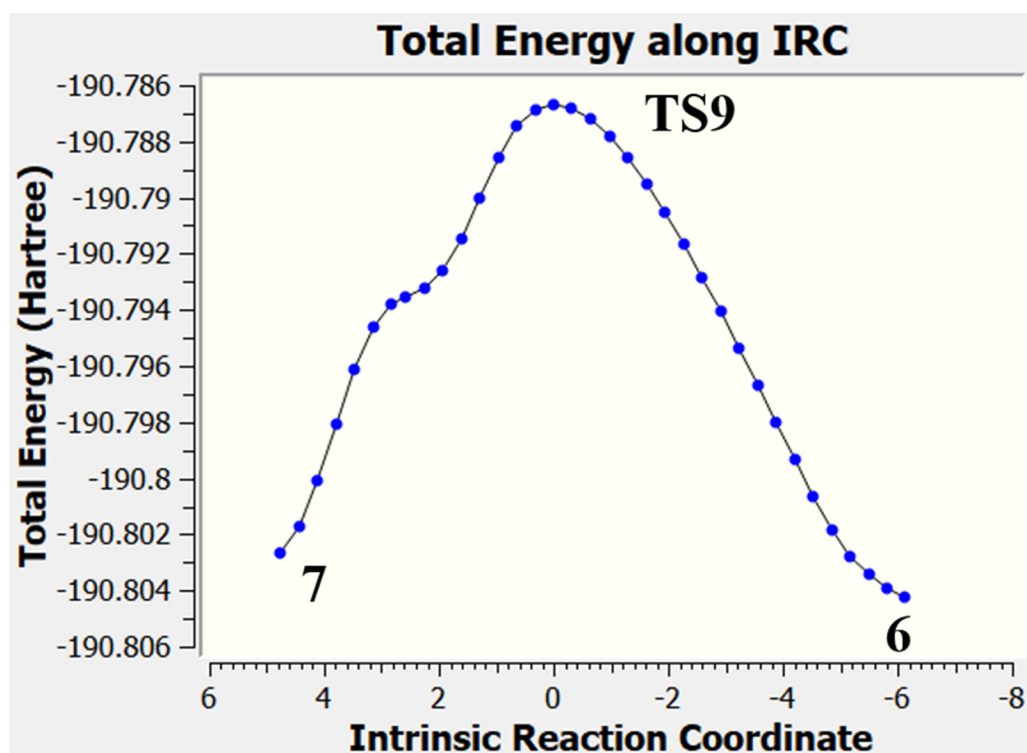



Figure S7: Intrinsic Reaction Coordinate for the rearrangement from **12** to **4** and **10** to **5** calculated at UB3LYP/6-311+G(d,p) level of theory.

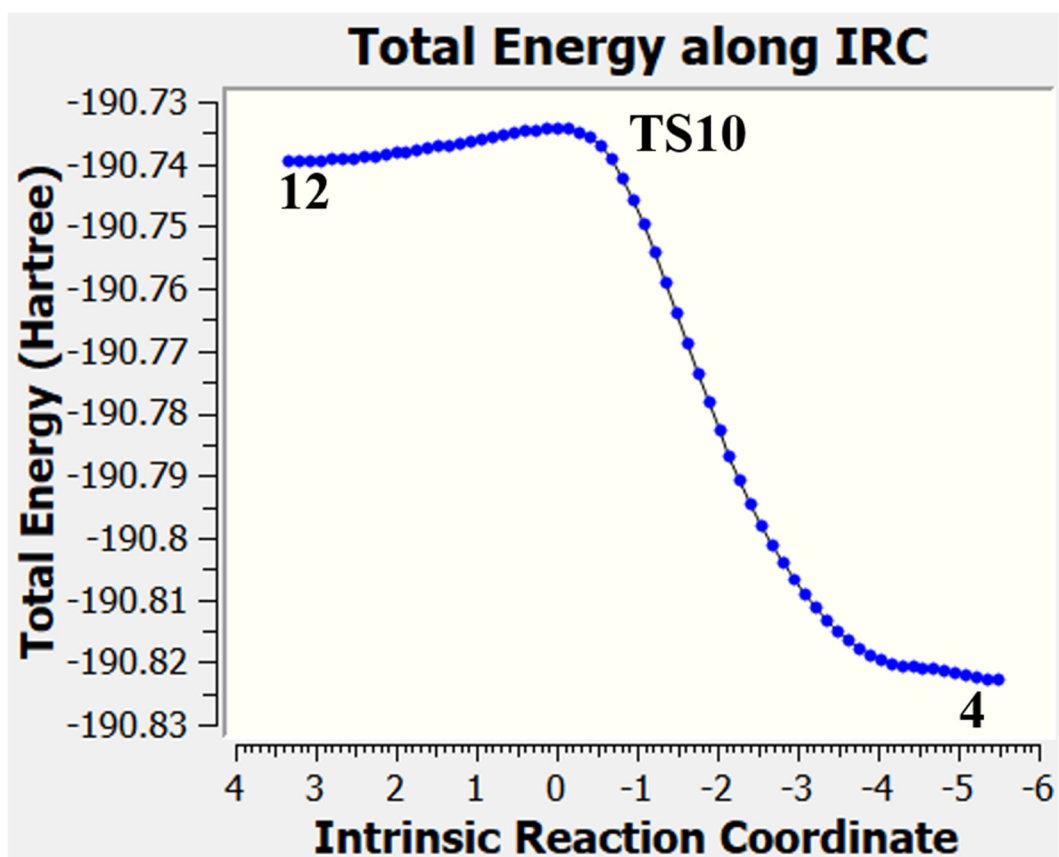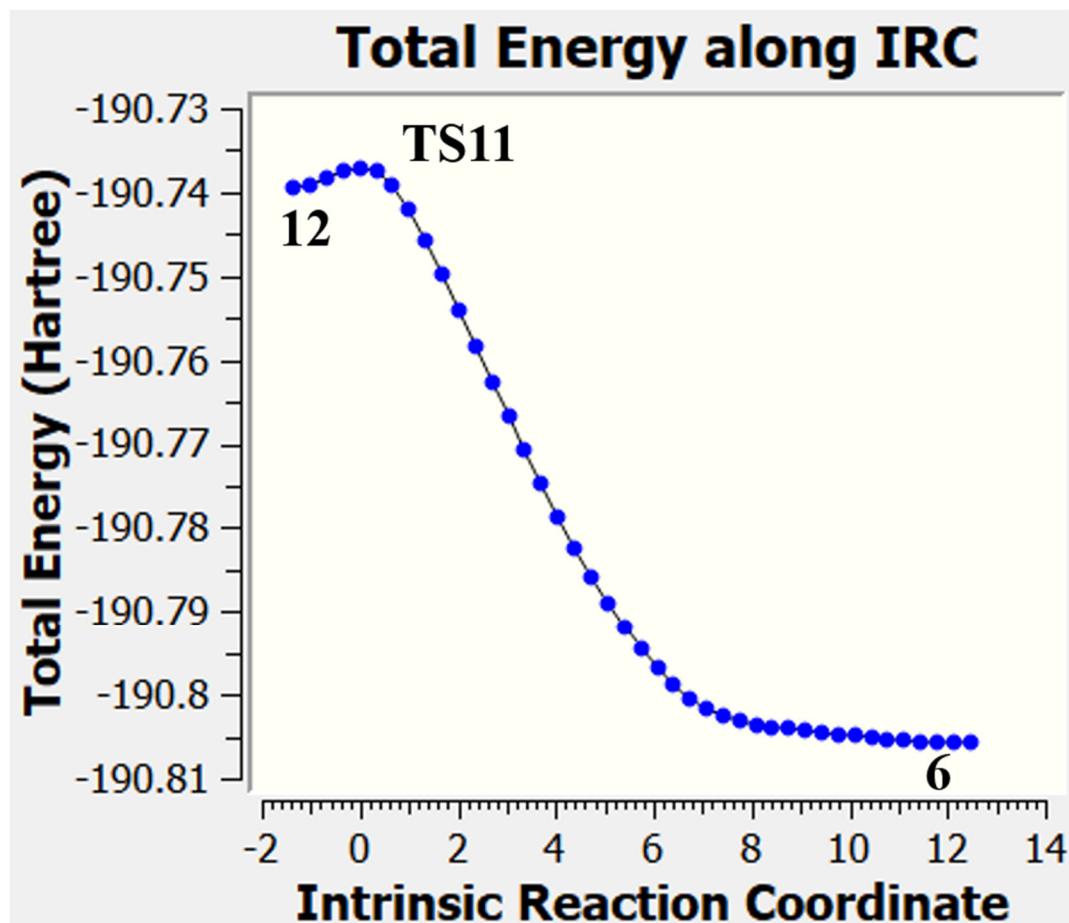

Figure S8: Energy evolution of isomer **6** - **14** of  $C_5H$  obtained from the AIMD simulation carried out at 298.15K temperatures and 1 atm pressure for 2500 fs at the B3LYP/6-311+G(d,p) level of theory.

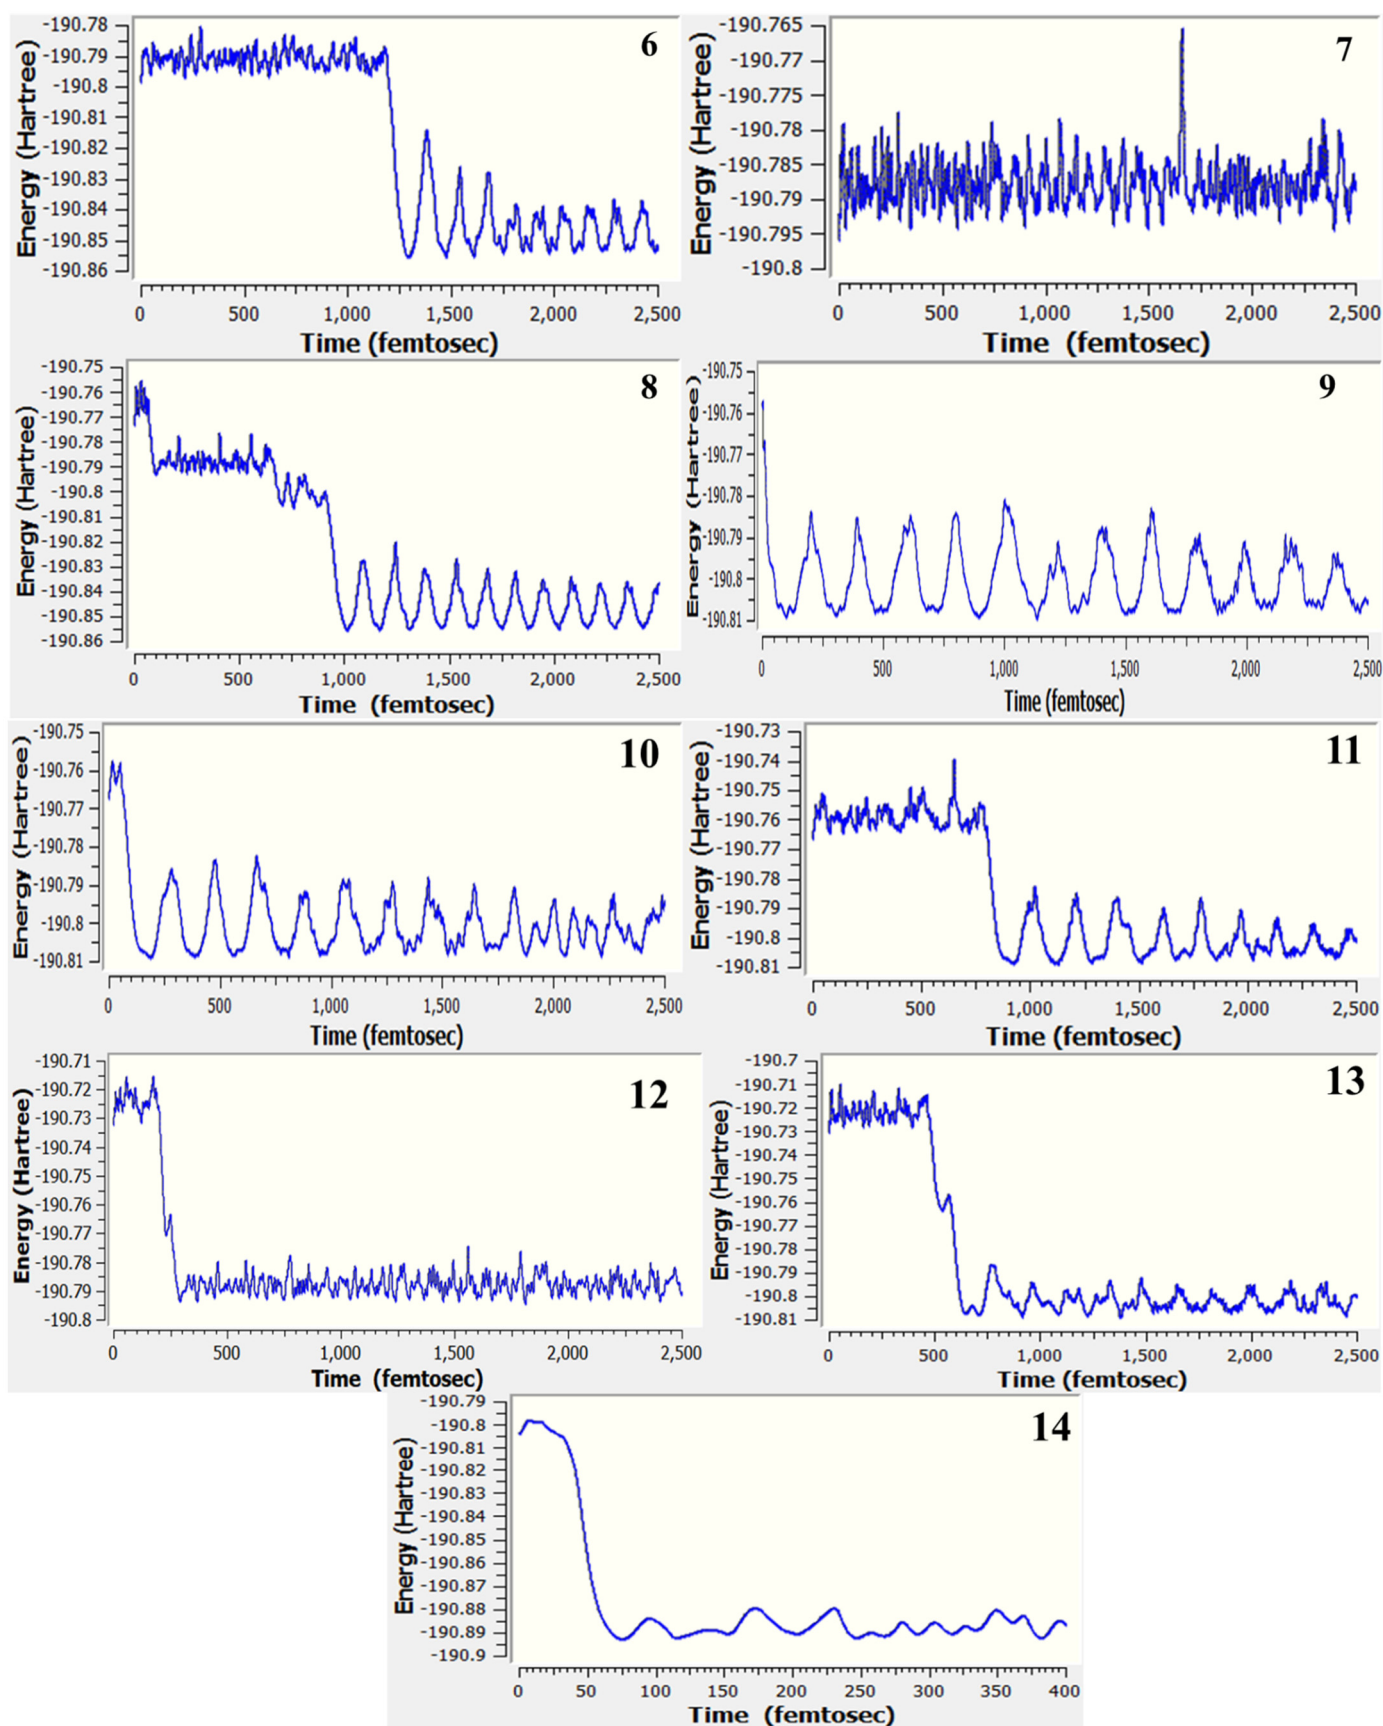

Supplement: s1 [file s1]
